# Supplementary material
Source: PubMed Central journal article supplement (PMC6620407)
Supplement: JB.00165-19-s0001.pdf [file JB.00165-19-s0001.pdf]

**Table S1 Sequences of mutagenesis primers used in this study.** The modified codon is shown in bold and the nucleotide mismatches are shown in red. Primers used for IVA mutagenesis are appended with “IVA” in the name.

| Primer name   | Sequence                                           |
|---------------|----------------------------------------------------|
| R200A_IVA_Fwd | ATCGAAGGCAAG <b>GCC</b> GCCAGTTACCAGGCTACC         |
| R200A_IVA_Rev | CTTGCCTTCGATATCCTGCTC                              |
| Y203A_Fwd     | AGCGTGCCAGT <b>GCC</b> CAGGCTACCAAGG               |
| Y203A_Rev     | TGGTAGCCTGG <b>GCA</b> CTGGCACGCTTGC               |
| E216A_IVA_Fwd | GGTTGCTGG <b>CCG</b> CGGACAGCATCCGGCG              |
| E216_IVA_Rev  | CCAGCAACCGGGCG                                     |
| R281A_IVA_F   | GCAGCGTTTT <b>CCG</b> CACCGAGGTGAATAACCAGC         |
| R281A_IVA_R   | GAAAACGCTGCGCGAG                                   |
| T282A_IVA_Fwd | GCGTTTTCCGC <b>GCC</b> GAGGTGAATAACCAGCAG          |
| T282A_IVA_Rev | GCGGAAAACGCTGCG                                    |
| E283A_IVA_Fwd | TTCCGCACCG <b>CGG</b> TGAATAACCAGCAGATTCC          |
| E283A_IVA_Rev | CGGTGCGGAAAACGCTG                                  |
| D312A_Fwd     | GGCG <b>CCG</b> ACTTCACCGAGCC                      |
| D312A_Rev     | TGAAGTC <b>GGC</b> GCCCTTGCCTTTG                   |
| D313A_Fwd     | GGGCGAT <b>GCCT</b> TACCGAGCC                      |
| D313A_Rev     | TCGGTGAAG <b>GCAT</b> CGCCCTTGC                    |
| F314A_Fwd     | AGGGCGATGAC <b>GCC</b> CACCGAGCCCCGC               |
| F314A_Rev     | GGGGCTCGGT <b>GCGC</b> TATCGCCCTTG                 |
| R318A_IVA_Fwd | CTTCACCGAGCCC <b>GCCG</b> TGGCGAAGATCCGGC          |
| R318A_IVA_Rev | GGGCTCGGTGAAGTCATCG                                |
| N332A_IVA_Fwd | AAGCAGTTGGAAAACG <b>CCG</b> TGAAGTGCAATACCTGC      |
| N332A_IVA_Rev | GTTTTCCAAGTCTTCAGCTC                               |
| R333A_Fwd     | TTGGAAAACAAC <b>GCCG</b> GAAGTGCAATACCTGCAGG       |
| R333A_Rev     | GTATTGCACTTC <b>GGCG</b> TTGTTTTCCAAGTCTTC         |
| R341A_IVA_Fwd | ATACCTGCAGGCT <b>GCCA</b> AAGGGCGAGGAGCGCTTC       |
| R341A_IVA_Rev | AGCCTGCAGGTATTGCACTTC                              |
| E344A_Fwd     | AAAGGGCG <b>CGG</b> AGCGCTTCTTCG                   |
| E344A_Rev     | GCTCC <b>GCG</b> CCCTTTCGAGCC                      |
| Y203F_IVA_Fwd | AAGCGTGCCAGTT <b>TCC</b> AGGCTACCAAGGAAGG          |
| Y203F_IVA_Rev | AACTGGCACGCTTGCC                                   |
| E216D_IVA_Fwd | GGTTGCTGG <b>ACG</b> CGGACAGCATCCGGCG              |
| D312E_IVA_Fwd | CGCAAGGGCG <b>AGG</b> ACTTCACCGAGCCCCG             |
| D312E_IVA_Rev | TCGCCCTTGCCTTTGAG                                  |
| F314Y_IVA_Fwd | AAGGGCGATGACT <b>AC</b> CACCGAGCCCCGCGTG           |
| F314Y_IVA_Rev | AGTCATCGCCCTTGCCTTTG                               |
| R318K_IVA_Fwd | CTTCACCGAGCCC <b>AAGG</b> TGGCGAAGATCCGGC          |
| N332Q_IVA_Fwd | AAGCAGTTGGAAAAC <b>CAAG</b> CGTGAAGTGCAATACCTGC    |
| R333K_IVA_Fwd | CAGTTGAAAACAAC <b>AAGG</b> AAGTGCAATACCTGCAGG<br>C |
| R333K_IVA_Rev | GTTGTTTTCCAAGTCTTCAGC                              |

|               |                                               |
|---------------|-----------------------------------------------|
| R341K_IVA_Fwd | ATACCTGCAGGCT <b>AAG</b> AAGGGCGAGGAGCGCTTC   |
| E344D_IVA_Fwd | GCTCGAAAGGGCG <b>AC</b> GAGCGCTTCTTCGAAAACATC |
| E344D_IVA_Rev | TCGCCCTTTCGAGCCTG                             |

**Table S2 Sequences of primers used in this study for generating deletion, complementation, and chimeric constructs.** The template-binding region is underlined and restriction sites are bolded.

| Primer Name        | Sequence                                                                        | Description                                                                                                                                               |
|--------------------|---------------------------------------------------------------------------------|-----------------------------------------------------------------------------------------------------------------------------------------------------------|
| Z1_Swp138-146_Z2_F | <b>AGAAGGACCCC</b> <u>CAGGCGGCGCCTTTC</u><br><u>TACACCGTGATCTTTGAAAAGCAC</u>    | Swaps residues 138-146 of Wzz <sub>1</sub> with residues 133-145 of Wzz <sub>2</sub> . The homologous primer regions are highlighted.                     |
| Z1_Swp138-146_Z2_R | <b>GGGGTCCTTCT</b> <u>TCAAGTCCGCTGCT</u><br><u>GTATTCCATTTCTTCAGAAAGATTCCG</u>  |                                                                                                                                                           |
| Z2_Del_141-144_F   | <b>AGAAGGACCCC</b> <u>TTCTTCCGCTTGTC</u><br><u>ATGCAG</u>                       | Deletes residues 141-144 of Wzz <sub>2</sub> . The homologous primer regions are highlighted.                                                             |
| Z2_Del_141-144_R   | <b>GGGGTCCTTCT</b> <u>TCAAGTCCG</u>                                             |                                                                                                                                                           |
| Z1_ins_QAAP_IL_F   | <b>GGCGGCGC</b> <u>CTCGCTACACCGTGATCT</u><br><u>TTG</u>                         | Inserts amino acid sequence QAAP between E145 and R146 of Wzz <sub>1</sub> . The homologous primer regions are highlighted.                               |
| Z1_ins_QAAP_IL_R   | <b>GCGCCGCC</b> <u>TGCTCACGCTCATCCTTA</u><br><u>CTAGG</u>                       |                                                                                                                                                           |
| Z2Del271-279_IVA_F | <b>GGAGAGTTCGCACC</b> <u>GAGGTGAATA</u><br><u>ACC</u>                           | Deletes residues 271-279 of Wzz <sub>2</sub> . The homologous primer regions are highlighted.                                                             |
| Z2Del271-279_IVA_R | <b>GGTGCGGAACTCTCC</b> <u>CAGTGCGCCC</u>                                        |                                                                                                                                                           |
| Z2_L4_Flex_Swap_F  | <b>GGGGATCAGGAGG</b> <u>GGGAGGGTTCCG</u><br><u>CACCGAGGTGAATAAC</u>             | Replaces residues 271-279 of Wzz <sub>2</sub> with the amino acid sequence GGGGSGGGG. The homologous primer regions are highlighted.                      |
| Z2_L4_Flex_Swap_R  | <b>CCTCCTGATCCCC</b> <u>CTCCCCCTCTCCC</u><br><u>AGTGCGCC</u>                    |                                                                                                                                                           |
| Z2_L4_Rig_Swap_F   | <b>ATGCTGCAGCTAA</b> <u>GGCGGCCTTCCGC</u><br><u>ACCGAGGTGAATAACC</u>            | Replaces residues 271-279 of Wzz <sub>2</sub> with the amino acid sequence AAEEAKAA. The homologous primer regions are highlighted.                       |
| Z2_L4_Rig_Swap_R   | <b>TTAGCTGCAGCAT</b> <u>CAGCCGCCTCTCC</u><br><u>CAGTGCGCCCGG</u>                |                                                                                                                                                           |
| O13_Z1Up_Flank_F   | <u>ACCTGTTCAAAGACTGATCAGCATGC</u><br><u>TAAAAGAG</u>                            | Primers to amplify the upstream fragment of the Wzz <sub>1</sub> deletion construct. Region homologous to the downstream fragment is highlighted.         |
| O13_Z1del_R_Soe    | <b>GCGCGAGACCTTCTAACGGCTTCTTC</b><br><b>TGTCACA</b> <u>ACTAGTCCGTCTTTGATTGG</u> |                                                                                                                                                           |
| O13_Z1del_F_Soe    | <b>CTAGTTGTGACAGAAGAAGCCGTTAG</b><br><b>AAGGTCTCGCGC</b> <u>AAAAATAGTC</u>      | Primers to amplify the downstream fragment of the Wzz <sub>1</sub> deletion construct. Region that is homologous to the upstream fragment is highlighted. |
| O13_Z1Dn_Flank_R   | <u>TTTGACCAGCTGAGAACTACATACG</u><br><u>CACCC</u>                                |                                                                                                                                                           |
| O13_Z1Up_F_EcoRI   | <u>TGACGAATTCACCCATCAGGGGCAA</u><br><u>CTGTCCGCG</u>                            | Primers to amplify the entire Wzz <sub>1</sub> deletion construct. Added restriction sites are shown in bold.                                             |
| O13_Z1Dn_Rev_XbaI  | <u>AGCTTCTAGACGGATGATAACCTATG</u><br><u>CTTTGAGCCTTATGGG</u>                    |                                                                                                                                                           |
| O13_Z2Up_Flank_F   | <u>GTTGTAGGGGCGAACCAGGCGGAG</u>                                                 | Primers to amplify the upstream fragment of the Wzz <sub>2</sub> deletion construct. Region homologous to the downstream fragment is                      |
| O13_Z2del_R_SOE    | <b>AGGTCCC</b> <u>GAAAGGCTAAGCTGTGA</u><br><b>GGAAGGCATA</b> <u>CCAACGTCC</u>   |                                                                                                                                                           |

|                    |                                                                 |                                                                                                                                                                                       |
|--------------------|-----------------------------------------------------------------|---------------------------------------------------------------------------------------------------------------------------------------------------------------------------------------|
|                    |                                                                 | highlighted.                                                                                                                                                                          |
| O13_Z2del_Fwd_SOE  | <b>TATGCCTTCCTCACAGCTTAGCCTTC</b><br><b>CGGGACCT</b> GAGACCAAAG | Primers to amplify the downstream fragment of the Wzz <sub>2</sub> deletion construct. Region that is homologous to the upstream fragment is highlighted.                             |
| O13_Z2Dn_Flank_R   | TCCTTGCTGCCATTGCTCGATCGC                                        |                                                                                                                                                                                       |
| O13_Z2Up_Fwd_EcoRI | AGCTGAATTCTACCAGGAGAGAAAC<br>GCTCATGCCTTGC                      | Primers to amplify the entire Wzz <sub>2</sub> deletion construct. Added restriction sites are shown in bold.                                                                         |
| O13_Z2Dn_Rev_XbaI  | AGCTTCTAGAGGTTCTGCCCCTGGTT<br>GTCGACGG                          |                                                                                                                                                                                       |
| O13_Wzz1Fwd_EcoRI  | AGCTGAATTCAGTGACAGAAGAAAC<br>CTTTTCCAGC                         | Primers to amplify full-length Wzz <sub>1</sub> . Restriction sites are in bold.                                                                                                      |
| O13_Wzz1_Rev_XbaI  | AGCTTCTAGACTATTTTGC GCGAGAC<br>CTTCTAACG                        |                                                                                                                                                                                       |
| O13_Z2_Fwd_EcoRI   | TCGAGAATTCTATGCCTTCCTCACAG<br>CTTCCG                            | Primers to amplify full-length Wzz <sub>2</sub> . Restriction sites are in bold.                                                                                                      |
| O13_Z2_Rev_XbaI    | CATGTCTAGATCAGGTCCCGGAAAG<br>GCTC                               |                                                                                                                                                                                       |
| Z1_TM1_R_SOE_Z2    | <b>CTGGTAGGTCGGAACACTTAAAAAGG</b><br><b>CATA</b> TGTCCC         | Reverse primer to amplify the Wzz <sub>1</sub> TM1 region (residues 1-50) and add a region homologous to the Wzz <sub>2</sub> periplasmic region (yellow).                            |
| Z2_Prpf_F_SOE_Z1   | <b>TATGCCTTTTTAAGTGTCCGACCTAC</b><br><b>CAG</b> GTGG            | Primers to amplify the Wzz <sub>2</sub> periplasmic region (residues 49-391) and add a region homologous to the Wzz <sub>1</sub> TM1 and TM2 regions (yellow and green, respectively) |
| Z2_Prpf_R_SOE_Z1   | <b>CAGCACTAGAAGTATCTTGCGCGGC</b><br><b>T</b> GATC               |                                                                                                                                                                                       |
| Z1_TM2_F_SOE_Z2    | <b>CAAGCCGCGCAAGATACTTCTAGTGC</b><br><b>TG</b> GGTGC            | Forward primer to amplify the Wzz <sub>1</sub> TM2 region (residues 320-349) and add a region homologous to the Wzz <sub>2</sub> periplasmic region (green)                           |
| Z2_TM1_R_SOE_Z1    | <b>CTCATAAACCGGCTTGGCCAACAGCG</b><br><b>CG</b> TAG              | Reverse primer to amplify the Wzz <sub>2</sub> TM1 region (residues 1-48) and add a region homologous to the Wzz <sub>2</sub> periplasmic region (yellow).                            |
| Z1_Prpf_F_SOE_Z2   | <b>CGCGCTGTTGGCCAAGCCGTTTATG</b><br><b>AG</b> G                 | Primers to amplify the Wzz <sub>1</sub> periplasmic region (residues 51-319) and add a region homologous to the Wzz <sub>2</sub> TM1 and TM2 regions (yellow and green, respectively) |
| Z1_Prpf_Rev_SOE_Z2 | <b>CCACCACCAAGGCTCCCTTCTCGGG</b><br><b>CG</b> AAC               |                                                                                                                                                                                       |
| Z2_TM2_F_SOE_Z1    | <b>CGCCCGAAGAAGGGAGCCTTGGTGGT</b><br><b>GC</b> CCTTG            | Forward primer to amplify the Wzz <sub>2</sub> TM2 region (residues 392-442) and add a region homologous to the                                                                       |

|                 |                                                                         |                                                                                                                                                                               |
|-----------------|-------------------------------------------------------------------------|-------------------------------------------------------------------------------------------------------------------------------------------------------------------------------|
|                 |                                                                         | Wzz <sub>1</sub> periplasmic region<br>(green)                                                                                                                                |
| Z2_F_FLAG_N_IVA | <b>AAAGACGATGACG</b> <u>ACAAGCCTTCCTC</u><br><u>ACAGCTTCCG</u>          | IVA primers to add a FLAG tag to the N-terminus of Wzz <sub>2</sub> , using wzz <sub>2</sub> -pherd20T as a template. Homologous regions of the primer are highlighted yellow |
| Z2_R_FLAG_N_IVA | <b>CGTCATCGTCTTT</b> <u>GTAGTCCATAGAAT</u><br><u>TCTTATCAGATCCCATGG</u> |                                                                                                                                                                               |

**Table S3 Homologs of O13 Wzz<sub>1</sub> and Wzz<sub>2</sub> used to generate an MSA.** The Accession, and GI sequences for each sequence are given. The percent identity (PCID) to the O13 Wzz<sub>1</sub> or Wzz<sub>2</sub> is shown.

| Species                                        | Accession      | GI            | PCID Wzz <sub>1</sub> | PCID Wzz <sub>2</sub> |
|------------------------------------------------|----------------|---------------|-----------------------|-----------------------|
| <i>Pseudomonas</i>                             | WP_028698674.1 | GI:655289472  | 39.3                  | 18                    |
| <i>Pseudomonas</i>                             | WP_060514541.1 | GI:983330316  | 37.7                  | 16.2                  |
| <i>Pseudomonas</i>                             | WP_087092368.1 | GI:1198982522 | 35                    | 18.9                  |
| <i>Pseudomonas</i>                             | WP_092197691.1 | GI:1224169516 | 35.1                  | 16.4                  |
| <i>Pseudomonas</i>                             | WP_102684332.1 | GI:1332654438 | 15                    | 34.6                  |
| <i>Pseudomonas</i>                             | WP_102684334.1 | GI:1332654440 | 34.2                  | 18.6                  |
| <i>Pseudomonas alcaligenes</i>                 | WP_083700870.1 | GI:1180181518 | 36                    | 20.8                  |
| <i>Pseudomonas benzenivorans</i>               | WP_090444700.1 | GI:1222392540 | 44.9                  | 18.5                  |
| <i>Pseudomonas chlororaphis</i>                | SDS58113.1     | GI:1085883455 | 38.4                  | 17                    |
| <i>Pseudomonas chlororaphis subsp. piscium</i> | AVO60423.1     | GI:1364858823 | 39.3                  | 17.4                  |
| <i>Pseudomonas deceptionensis</i>              | SEE98527.1     | GI:1089097821 | 17.3                  | 41.4                  |
| <i>Pseudomonas donghuensis</i>                 | WP_010224133.1 | GI:497909977  | 15.2                  | 39.2                  |
| <i>Pseudomonas donghuensis</i>                 | WP_010224134.1 | GI:497909978  | 39.4                  | 18.4                  |
| <i>Pseudomonas donghuensis</i>                 | KDN97867.1     | GI:641461310  | 16.8                  | 39.7                  |
| <i>Pseudomonas entomophila</i>                 | WP_011532778.1 | GI:499852044  | 34.3                  | 17.2                  |
| <i>Pseudomonas extremorientalis</i>            | WP_083351555.1 | GI:1179583345 | 16                    | 39.8                  |
| <i>Pseudomonas fluorescens</i>                 | WP_057713773.1 | GI:951328000  | 41.9                  | 18.6                  |
| <i>Pseudomonas furukawai</i>                   | WP_003458269.1 | GI:489553670  | 20.9                  | 48.7                  |
| <i>Pseudomonas fuscovaginae</i>                | SEI23467.1     | GI:1093277890 | 15.5                  | 40.5                  |
| <i>Pseudomonas helleri</i>                     | WP_088500293.1 | GI:1210505805 | 15.8                  | 41                    |
| <i>Pseudomonas koreensis</i>                   | WP_083368292.1 | GI:1179600091 | 17.1                  | 42.5                  |
| <i>Pseudomonas kuykendallii</i>                | WP_090225885.1 | GI:1222170723 | 33.1                  | 18.4                  |

|                                                  |                |               |      |      |
|--------------------------------------------------|----------------|---------------|------|------|
| <i>Pseudomonas kuykendallii</i>                  | WP_090231723.1 | GI:1222176593 | 21   | 45.6 |
| <i>Pseudomonas lundensis</i>                     | WP_094988732.1 | GI:123683160  | 16.5 | 42.4 |
| <i>Pseudomonas mandelii JR-1</i>                 | AHZ68776.1     | GI:635286031  | 15.3 | 40.2 |
| <i>Pseudomonas mucidolens</i>                    | SDU95947.1     | GI:1086080869 | 15.4 | 37.8 |
| <i>Pseudomonas mucidolens</i>                    | WP_084378137.1 | GI:1180957500 | 15.3 | 40.6 |
| <i>Pseudomonas oleovorans</i>                    | WP_074859164.1 | GI:1124576746 | 17.9 | 45.9 |
| <i>Pseudomonas pelagia</i>                       | WP_096347522.1 | GI:1246429560 | 29.6 | 19   |
| <i>Pseudomonas poae</i>                          | WP_105696847.1 | GI:1358900923 | 14.4 | 36   |
| <i>Pseudomonas putida</i>                        | WP_009407565.1 | GI:496914543  | 15.9 | 39.9 |
| <i>Pseudomonas putida</i>                        | WP_014592020.1 | GI:504404918  | 36.7 | 18.8 |
| <i>Pseudomonas putida</i>                        | WP_058541039.1 | GI:966532312  | 39.6 | 21   |
| <i>Pseudomonas putida</i>                        | WP_069942143.1 | GI:1072320209 | 39.8 | 18.9 |
| <i>Pseudomonas putida</i>                        | WP_103462906.1 | GI:1337998616 | 13.9 | 98.6 |
| <i>Pseudomonas segetis</i>                       | WP_089358910.1 | GI:1219343216 | 38.8 | 19.4 |
| <i>Pseudomonas</i> sp.<br>1239                   | WP_088514052.1 | GI:1211613052 | 14.7 | 34.8 |
| <i>Pseudomonas</i> sp.<br>ACN8                   | WP_095943962.1 | GI:1243218902 | 34.1 | 16.3 |
| <i>Pseudomonas</i> sp.<br>ATCC 13867             | WP_015478627.1 | GI:505291525  | 20.1 | 45.3 |
| <i>Pseudomonas</i> sp.<br>DrBHI1                 | WP_088851820.1 | GI:1214579283 | 35   | 16.4 |
| <i>Pseudomonas</i> sp.<br>DrBHI1                 | WP_088851822.1 | GI:1214579285 | 15.4 | 31.7 |
| <i>Pseudomonas</i> sp. Ep<br>R1                  | WP_079305324.1 | GI:1159758603 | 40.6 | 19.6 |
| <i>Pseudomonas</i> sp.<br>FSL W5-0299            | WP_077747951.1 | GI:1149195551 | 38   | 19.5 |
| <i>Pseudomonas</i> sp.<br>GM21                   | WP_007942594.1 | GI:495217817  | 16.7 | 40.8 |
| <i>Pseudomonas</i> sp.<br>GM48                   | WP_007985394.1 | GI:495260639  | 37   | 18.3 |
| <i>Pseudomonas</i> sp.<br>GM74                   | WP_008049008.1 | GI:495324263  | 35.6 | 19.4 |
| <i>Pseudomonas</i> sp.<br>GW456-11-11-14-<br>LB2 | WP_102643277.1 | GI:1332593823 | 39.2 | 19.3 |

|                                       |     |                |               |      |      |
|---------------------------------------|-----|----------------|---------------|------|------|
| <i>Pseudomonas</i><br>GW456-E7        | sp. | WP_102700290.1 | GI:1332681941 | 38.6 | 16.4 |
| <i>Pseudomonas</i><br>HMSC063H08      | sp. | OFQ79174.1     | GI:1080918678 | 44.3 | 19.2 |
| <i>Pseudomonas</i><br>HMSC066A08      | sp. | WP_070747362.1 | GI:1092830961 | 18.7 | 98.9 |
| <i>Pseudomonas</i><br>HMSC069G05      | sp. | OFQ30146.1     | GI:1080867084 | 49.1 | 19.6 |
| <i>Pseudomonas</i><br>HMSC11A05       | sp. | WP_070581731.1 | GI:1092635972 | 48.8 | 18.9 |
| <i>Pseudomonas</i><br>Irchel 3E13     | sp. | WP_095155502.1 | GI:1237014924 | 33.7 | 17.4 |
| <i>Pseudomonas</i><br>Irchel 3E13     | sp. | WP_095155722.1 | GI:1237015144 | 16.9 | 40.8 |
| <i>Pseudomonas</i><br>Irchel s3b6     | sp. | WP_095143914.1 | GI:1237002759 | 39.8 | 19.2 |
| <i>Pseudomonas</i><br>LAMO17WK12:I8   | sp. | SNT23956.1     | GI:1216101759 | 33.6 | 17.5 |
| <i>Pseudomonas</i><br>M30-35          | sp. | WP_087516191.1 | GI:1200072377 | 20.2 | 41.3 |
| <i>Pseudomonas</i><br>MF6396          | sp. | WP_078479769.1 | GI:1154103702 | 16.6 | 38.3 |
| <i>Pseudomonas</i><br>NBRC 111140     | sp. | WP_060492586.1 | GI:983306451  | 34.7 | 18.2 |
| <i>Pseudomonas</i><br>NFR16           | sp. | WP_093460654.1 | GI:1225451655 | 46.8 | 19.5 |
| <i>Pseudomonas</i><br>PA27(2017)      | sp. | WP_075933891.1 | GI:1132273813 | 16.7 | 41.9 |
| <i>Pseudomonas</i><br>PIC25           | sp. | WP_095601145.1 | GI:1240435549 | 20.1 | 45.9 |
| <i>Pseudomonas</i><br>PIC25           | sp. | WP_095601146.1 | GI:1240435550 | 20.5 | 47.7 |
| <i>Pseudomonas</i><br>SWI6            | sp. | WP_104882382.1 | GI:1352974433 | 17.6 | 39.1 |
| <i>Pseudomonas</i><br>TTU2014-080ASC  | sp. | WP_058067976.1 | GI:953983081  | 16.6 | 42.2 |
| <i>Pseudomonas</i><br>UW4             | sp. | WP_015093986.1 | GI:504906884  | 39.6 | 18.8 |
| <i>Pseudomonas</i><br>WN033           | sp. | WP_095626167.1 | GI:1240461238 | 18.9 | 46   |
| <i>Pseudomonas</i><br>WN033           | sp. | WP_095626245.1 | GI:1240461316 | 20.6 | 48.2 |
| <i>Pseudomonas</i><br><i>stutzeri</i> |     | WP_102851015.1 | GI:1332889887 | 21.9 | 46.1 |
| <i>Pseudomonas</i><br><i>stutzeri</i> |     | WP_102856965.1 | GI:1332896113 | 19.7 | 40.6 |



|                                      |                |               |      |      |
|--------------------------------------|----------------|---------------|------|------|
| <i>Pseudomonas<br/>yangmingensis</i> | WP_093477159.1 | GI:1225468176 | 20.2 | 43.8 |
|--------------------------------------|----------------|---------------|------|------|

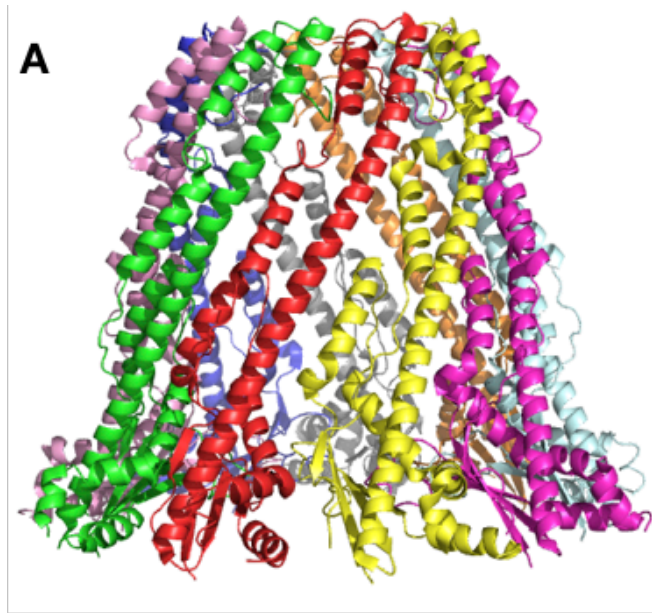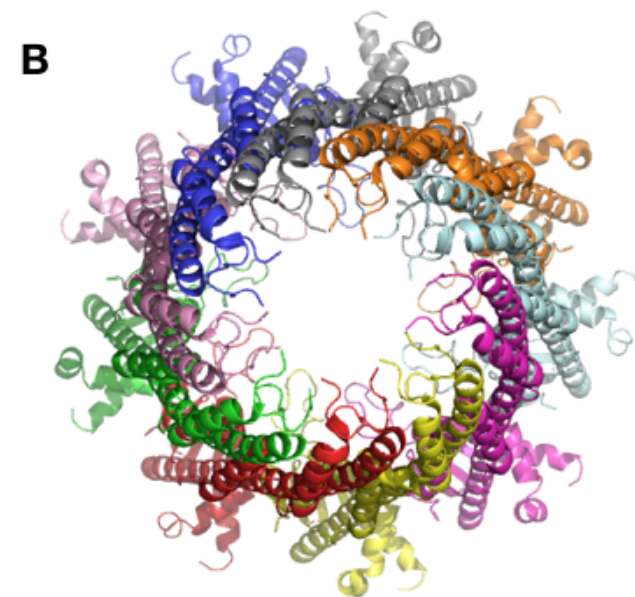

**Figure S1 Head-on (A) and top-down (B) views of octameric FepE from *E. coli* (PDB ID: 3B8M). Individual protomers are separately colored.**

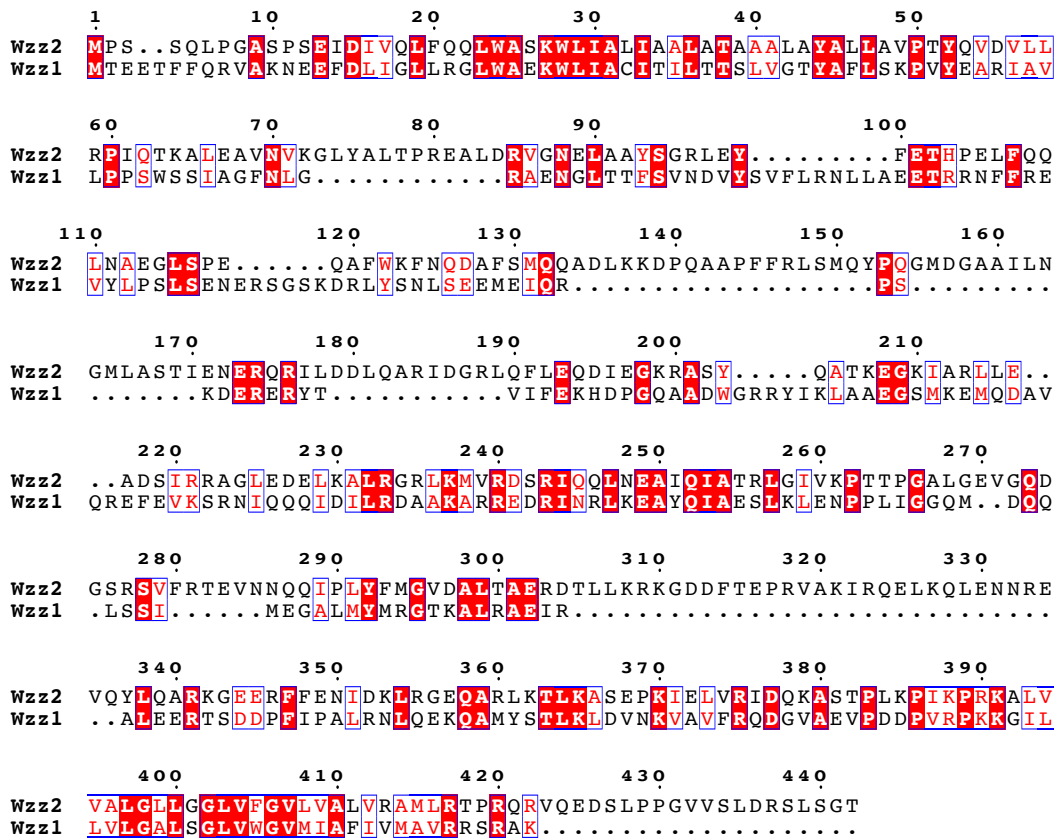

**Figure S2 Multiple sequence alignment of Wzz<sub>1</sub> and Wzz<sub>2</sub> from *P. aeruginosa* IATS O13. Identical residues are coloured white with a red background and similar residues are coloured red with a white background.**

WP\_103462906.1/1-459  
WP\_104882382.1/1-434  
WP\_088514052.1/1-496  
KDN97867.1/1-468  
WP\_078479769.1/1-454  
WP\_088851822.1/1-452  
WP\_009407565.1/1-451  
WP\_010224133.1/1-445  
WP\_095155722.1/1-411  
SEE98527.1/1-443  
WP\_088500293.1/1-447  
WP\_105696847.1/1-435  
SEI23467.1/1-450  
WP\_083351555.1/1-458  
SDU95947.1/1-478  
WP\_084378137.1/1-454  
WP\_094988732.1/1-456  
WP\_102684332.1/1-464  
AHZ68776.1/1-435  
WP\_083368292.1/1-426  
WP\_070747362.1/1-442  
O13Wz2/1-442  
WP\_075933891.1/1-437  
WP\_090231723.1/1-427  
WP\_058067976.1/1-443  
WP\_087516191.1/1-448  
WP\_007942594.1/1-445  
WP\_003458269.1/1-427  
WP\_015478627.1/1-434  
WP\_074859164.1/1-427  
WP\_093477159.1/1-432  
WP\_095626167.1/1-430  
WP\_095626245.1/1-424  
WP\_102856965.1/1-423  
WP\_095601146.1/1-435  
WP\_095601145.1/1-425  
WP\_102851015.1/1-435  
WP\_095943962.1/1-360  
SNT23956.1/1-381  
SDS58113.1/1-345  
WP\_087092368.1/1-349  
WP\_092197691.1/1-355  
WP\_077747951.1/1-351  
WP\_008049008.1/1-353  
WP\_079305324.1/1-357  
WP\_057713773.1/1-356  
WP\_007985394.1/1-344  
WP\_102700290.1/1-347  
WP\_095143914.1/1-353  
WP\_015093986.1/1-360  
AVO60423.1/1-351  
WP\_102643277.1/1-351  
WP\_010224134.1/1-358  
WP\_093460654.1/1-355  
WP\_102684334.1/1-353  
WP\_060492586.1/1-347  
WP\_095155502.1/1-368  
WP\_088851820.1/1-352  
WP\_014592020.1/1-350  
WP\_060514541.1/1-353  
WP\_011532778.1/1-346  
WP\_069942143.1/1-352  
WP\_028698674.1/1-358  
WP\_058541039.1/1-356  
WP\_090225885.1/1-350  
OFQ79174.1/1-345  
WP\_070581731.1/1-344  
O13Wz1/1-349  
OFQ30146.1/1-348  
WP\_090444700.1/1-394  
WP\_096347522.1/1-371  
WP\_083700870.1/1-372  
WP\_089358910.1/1-358

.....  
..MERGAI RWHNACKLTRQCALWLYSASSPIAYRCLSVRHGTYISARAGLN  
.....MVCRRGRALNPTDRDLFG  
.....MSLFIQADLR  
.....MRINSRQV  
.....MSGYFEVFPDRPSGD  
.....MSRISQVSHG  
.....MFTI  
.....MFIL...SSHL...DKRSNNKVRFL  
.....MP...QSKRP...AEQDVL LTRRLF  
.....MT  
.....MSSFRAPLVRPSNG  
.....MNGTPQLQSHVGS  
.....MSSFRAPPVSLSDH  
.....MTSISRIPSGSSD  
.....VVTSNQFP SLGLV  
.....MGPAAVFFRLEGRS  
.....MLSFILERT  
.....MNLPAKIRSENH  
.....MPSSQLPGASPS  
.....MPSSQLPGASPS  
.....MPHVPTARSQHD  
.....MLNNP TVSPRRDD  
.....MNDVTPSSRTGA  
.....MDAS  
.....MSHAES  
.....MNGPVVRPQQFSD  
.....MNA P LPPTRRSD  
.....MSTEPAKPYEPTAD  
.....MQTGAT  
.....MSQYTPLPQQPAST  
.....MPQYGNND  
.....MAMQOVNASTD  
.....MDLPVNT  
.....MKS R VHNKE  
.....MQNSN...STVNSSV  
.....MRND LERRSSDSE  
.....MSSNS...SSPVTDD  
.....MVLFM  
.....MQSDA...ANNQDAN  
.....MQNSH...GSQSSND  
.....MQVGS...SNSVND  
.....MQDNR...VEGRSAD  
.....MLQLS...TASTSSD  
.....MG  
.....MQGDS...REEKNVDFEF  
.....MQSSS...AGACSSS  
.....MQETS...SLPAGAN  
.....MRGDS...MANKKDE  
.....LKY  
.....MQDGRFENRADADA  
.....MTTSSRY...SQDAD  
.....MQNIR...GG.ADVG  
.....MAS...EQYRGGE  
.....MRNDR...ECRDKDH  
.....MRNER...ERRSG.ESD  
.....MRNDL...ERFKQER  
.....MRNER...SREVGND  
.....MNVVQ...DGRERAG  
.....MRNDR...ERLEGKS  
.....MRNDQ...GRLADDN  
.....MAQDC...ERLIASD  
.....MLTQRG...TADSSY  
.....MTADG  
.....MTTERSPRVPI  
.....MTEETFFQ  
.....MTENRYS...RQDADG  
.....VTDNNDYQHQAPRND  
.....MIYCNHIGAN  
.....MIOGHSSARAS  
.....MKTGTAS

1 1Q 2Q  
MKLDPRGSYRDASG EVDLFDLFRILWRRR  
...MDLGLGFLQTLWNKK  
VTSVSRIPPIAQQ EFDLFLATAQVWVQK  
TNIISRVPVVAHD ETDLIAMIQS IWRQK  
LASISRIPSVVTS EFDLTLTLLQA VWRQK  
IVESLGA VLSRRV EFDL FVIAQT IWRQK  
MSGYFEVFPDRPSGD DLDLFWALFQS LWRQK  
EVDLLYVVKI IWTQK  
...MFTI  
LTTYHNPKAQKPGP EIDL FELLAHSF WQK  
LKNTEHPRPKASSP EIDLVDLFSF WQK  
...MAHT IWKHR  
VSSISHAPLVISAHQ LDFELLRIVKSK  
MSSFRAPLVRPSNG IDL FVALSKF VWRQK  
LNKTPQLQSHVGS EIDL FELFQS IWRQK  
MSSFRAPPVSLSDH IDL FVLSQA IWRQK  
MTSISRIPSGSSD EIDL IALFQA IWRQK  
VVTSNQFP SLGLV EFNLFSAALWHGR  
MGPAAVFFRLEGRS EIDL IREILKS VWRQK  
MLSFILERT MNLPAKIRSENH EIDL IALLRD IWRQK  
MPSSQLPGASPS EIDL I VQLFQQ LWASK  
MPSSQLPGASPS EIDL I VQLFQQ LWASK  
MPHVPTARSQHD EIDL I GE LIRA LWERK  
MLNNP TVSPRRDD EIDL I VELIRA LWRQK  
MNDVTPSSRTGA EIDL L LAVA LWGSR  
MDAS MNARVSHGPESNSD EIDL FALINS LWLOR  
MSHAES LPPRPPIVPSFNTH EIDL SE L FST LWRQK  
MNGPVVRPQQFSD EVDL VALFKD LWKQK  
MNA P LPPTRRSD EIDL IALCGS LWAYK  
MSTEPAKPYEPTAD EIDL V L FQK LWQK  
MQTGAT VSDLTPOAH.FHDD EIDL FELAEN LWKEK  
MSQYTPLPQQPAST EIDL VALAHG LWQK  
MPQYGNND EIDL LALFES LWEQK  
MAMQOVNASTD EIDL VALFOA LWRQK  
MDLPVNT ISAHLPVQPV LND EIDL LAELFRS LWAKK  
MSDRQQYSPHED EIDL LAELIRS LWQK  
MKS R VHNKE LGKT VQHQTSTPE EIDL V L FRA LWRQK  
MQNSN...STVNSSV ELD I FEI FG VWRK  
MRND LERRSSDSE EVDL LEFLEG VWRQK  
MSSNS...SSPVTDD EVDL RV LFGT LWLQK  
MVLFM SNGA...VDFSSAD EVDL KRIFFV LWQK  
MQSDA...ANNQDAN EFDL FQIARA LWSQL  
MQNSH...GSQSSND EIDL YEIFQE IFSQK  
MQVGS...SNSVND GLDL HALAHT LWRQK  
MQDNR...VEGRSAD EIDL I E LVRG LWAKK  
MLQLS...TASTSSD EIDL I FVLIKA LWVQK  
MG EIDL I SDIFRV LWKKK  
MQGDS...REEKNVDFEF QRFVRA I LWRQK  
MQSSS...AGACSSS EIDL QALVRS LWRQK  
MQETS...SLPAGAN EIDL KVLAYV LWRQK  
MRGDS...MANKKDE EVDL QELVRV LWDKK  
LKY MRDS...NSGSEGLG EIGL ADL FKG VLAQR  
MQDGRFENRADADA DIDFVELLRL LWAGK  
MTTSSRY...SQDAD EIDL IEVARE LWQK  
MQNIR...GG.ADVG EMDLITL IAVLWGEK  
MAS...EQYRGGE EVDL GELFKS VWAQK  
MRNDR...ECRDKDH EIDL LAMLEL LWRQK  
MRNER...ERRSG.ESD LFDLLEW LWRK  
MRNDL...ERFKQER EFDL I FDLTEG VWRQK  
MRNER...SREVGND DLDVLELWV LWRK  
MNVVQ...DGRERAG EIDL IE L LV LFKEW  
MRNDR...ERLEGKS VVDL V LIEE LWRQK  
MRNDQ...GRLADDN EIDL IE L VEG VWRQK  
MAQDC...ERLIASD DIDL IE L IKG LWQK  
MLTQRG...TADSSY HLDLFDYLRLL LHRW  
MTADG EVDL VKLVKE LWVKK  
MTTERSPRVPI IDG I DLV LLAQ I LWRQK  
MTEETFFQ RQVAKNE EFDL IGLRGLWAEK  
MTENRYS...RQDADG EIDL LALVQG LWAGK  
VTDNNDYQHQAPRND EIDL V L FYG LWMQK  
MIYCNHIGAN VTTIKKTPPHSSND ELDL L DVAQD LWQK  
MIOGHSSARAS ETDL L LELVLL LWEQK  
MKTGTAS VNRITAEQSHASD EIDL V L VQK LWLQK

3 Q 4 Q 5 Q 6 Q 7 Q 8 Q 9 Q 10 Q  
WP\_103462906.1/1-459 A F I V A I G V F F A I I G V A L A Y V . I P P E Y E A S T T L R P V E L N Q L D A L N . . . . . R S K I Y . S L P P E E A L K R V G A R L D S Y N A R L E Y  
WP\_104882382.1/1-434 V Q I G A S A C L A G L L A G G Y A F M . L T P E Y Q V S T V L R P A A L N D L D G L N . . . . . R S K V Y . T L T P N Q A L N R I G A S L D S Y D T R L G Y  
WP\_088514052.1/1-496 K L I V A F S L M F A A L G G I Y A F T . A T P E Y E T S A V L R P S V A L N D L D A L N . . . . . R S G V Y . S L S P D E A L M R V A S A L D S Y E V R L G F  
K D N 9 7 8 6 7 . 1 / 1 - 4 6 8 K L I A S A A L L V G V I A G A Y A F I . T T P E Y E V G T V L R P A A L N D L D A L N . . . . . R S E V Y . S L P P G S A L V R V G A A L D S Y D T R L N Y  
WP\_078479769.1/1-454 K L I V I C S L F F G V I G A L F A Y T . V T P E Y E V S T I L R P A A L N D L D A L N . . . . . R S E I Y . S L P P S T A L I R V G A A L D S Y D T R L G Y  
WP\_088851822.1/1-452 L L V A T V A L V F T A M C V Y A Y L L A T P V Y Q V K S I L R P A S Q S L D A L K . . . . . R T G L Y . D V S P A S A L L R F G A A L D S Y D T R K A F  
WP\_009407565.1/1-451 L I V G F V L V A G A C S V G Y A M L . S T P I F Q A H S I L K P A P I N E L D A L N . . . . . R S E V Y . T L P P A A A L A R I A S S L G S Y E M R L S F  
WP\_010224133.1/1-445 R I V L S V L I A A L F A L V Y C F F F L V P V Y Q V T S V L R P V P M N D L D A L N . . . . . R S G L Y . S L S S E K A L K K V A S T L D S Y D T R L R F  
WP\_095155722.1/1-411 G L I G A A A A L V G L L F A I Y A F F I A T P V Y Q V T S V L R P V A L N D M D A L N . . . . . R S A L Y . S L S P E A A L L R V G T A L D S Y E A R L S Y  
S E E 9 8 5 2 7 . 1 / 1 - 4 4 3 K L I A A T A L A G F M A L G Y A L W . A Q P V Y Q T S S L R P V A I N E L D A L N . . . . . R S E V Y . K L P P E A A L L K V G S A L D S Y D T R L N Y  
WP\_088500293.1/1-447 K F I A T T S A I A G A I A L G Y V L V . V Q P I Y Q A S T V L R P A E I N E L D A L N . . . . . R S E V Y . K L P P N E A L L K V G A A L D S Y E T R L S F  
WP\_105696847.1/1-435 R F V L V S A V G A G L I A Y T F A S M . I T P Q I Y V A K S I L R P A A I N E L D A L N . . . . . R T Q V Y . Q L S P G E A L I N V G A S L E S Y D T R L G F  
S E I 2 3 4 6 7 . 1 / 1 - 4 5 0 N I V F S V A F I F V L M A V A Y V F F . V T P I Y Q V S S V L R P A A I N E L D A L N . . . . . R S G I Y . K L P P G E S L Q R V G A L D S Y E T R L R F  
WP\_083351555.1/1-458 K L L L L V T L G C G L I A A C Y A F L . V T P T Y K V S A A L R P A A I N E L D A L N . . . . . R S E V Y . Q L P P V D A L L K V G A A L D S Y D T R L A F  
S D U 9 5 9 4 7 . 1 / 1 - 4 7 8 K L V I G C T F V G L L G V Y A L L . A P R E Y R V S S V L R P A A I N E L D A L N . . . . . R S E V Y . K L P P A D A L L K V G S Q L D S Y D T R L S F  
WP\_084378137.1/1-454 L C I V A V A A G F G L V A A Y A Y V . A T P E Y H V S S V L R P A A I N E L D A L N . . . . . R S D I Y . K L P P G A A L K K V G A S L E S Y D T R L G F  
WP\_094988732.1/1-456 K I I I A T T I S G M M A L G Y A Y Y . A T P E Y Q V T S V L R S A A I N E L D A L N . . . . . R S G V Y . T L P P S E A L M K V G A S L E S Y D S R L G F  
WP\_102648329.1/1-464 R I V L A T T A L A T I A A L T Y A F . L V T P S Y K V S V L R P A A I N E L D A L N . . . . . R S G V Y . S L T P P E A L M R V G A A L D S Y E T R L R F  
A H Z 6 8 7 7 6 . 1 / 1 - 4 3 5 A I V L L F S G L G F V A A V T Y V T . L A T P E Y E V N T S L R P V S N T D L D E L N . . . . . E S G V Y . K I H P E A A L Q R I G S L M E S Y D V R L N F  
WP\_083368292.1/1-426 G L I I G T L V S T A I A V T Y V L . T A K P Q Y K V Q N S I T P V A S A L D L D E L N . . . . . E S G L Y . K I E P Q E A L L K V G S A L D S Y Y V R L Q F  
WP\_070747362.1/1-442 W L I A L I A A L A T A A A L A Y A L . L A V P T Y Q V D V L L R P I Q T K A L E A V N . . . . . V K G L Y . A L T P R E A L D R V G N E L A A Y S G R L E Y  
O 1 3 W z 2 / 1 - 4 4 2 W L I A L I A A L A T A A A L A Y A L . L A V P T Y Q V D V L L R P I Q T K A L E A V N . . . . . V K G L Y . A L T P R E A L D R V G N E L A A Y S G R L E Y  
WP\_075933891.1/1-437 K L I I G V A A V V T L L S V V A L . L A T K Y R T Q S T L R P V A M N V L D E L N . . . . . A S G L Y . E L T P E E A L Q R V G A G I S S Y E R L E Y  
WP\_090231723.1/1-427 F L I A G I T F A T L I A L A A Y A L . M A T P Y Y Q T Q T L R P A S A K D L D E L N . . . . . S S G L Y . K L S P E E A L K R V G A G I D S Y E R L E F  
WP\_058067976.1/1-443 F L I L G C T A C V L G A S V Y L Y . T A L P Y Q V T S V L P P A I N E L D A L N . . . . . G T K L F . T L T P E A A L L R V G T A L S W E N R L A F  
WP\_087516191.1/1-448 W L I A G V M A L L A T A A G T Y A L . L A T P Y Y Q A Q S V L K P T S L K S F D Q L N . . . . . L T G V Y . K V D R D Q V L N R I G I S L E S Y S T R Y D F  
WP\_007942594.1/1-445 Y L I A G I T L A A A M A A Y A Y . T A T P Q Y Q T K T L R P P S I K D L D A L N . . . . . Q T G V Y . T L N P E E S L K R V G A A L N S Y E V R K S Y  
WP\_003458269.1/1-427 L V L A I T G L A T I A A A V Y A F . T A T P Y Y K V S V L R P A A I N E L D A L N . . . . . G S G L Y . S L T P K Q A L R N V G D A L S Y S L R M K Y  
WP\_015478627.1/1-434 F L I L G V T L F I V A C S A L Y A T . L A T P Y Y Q V S V L R P I A L K D L D G L N . . . . . E T K L M . E L S P A K A L S Q V G A L E S Y S V R L Q F  
WP\_074859164.1/1-427 Y L I I A C T L A V A I C A A G Y A W . L A T P H Y Q V Q S M L R P A P L K E L D E L N . . . . . S T G V Y . P L T P E A A L Q R V G A A L D S Y S S R L Q F  
WP\_093477159.1/1-432 I L I A L V T A V V T F I A L A Y A L . L A T P Q Y Q T Q S T V R P T V V K S L D E L N . . . . . R L G V Y . K L K P G E A L A L V A A E L D S Y E A R L D Y  
WP\_095626167.1/1-430 V I G I A A V I V T L L A S I Y A W . F A T P H Y E Q S V L R P A A I K D L D E L N . . . . . A T G L Y . S L K P E A A L R R V G A A L D S Y D V R L N Y  
WP\_095626245.1/1-424 W L I A A I T A V V T V L A I G Y A F . L A T P Y Y E T Q S T L R P A A I K D L D E V N . . . . . A S G I Y . E I T P E E A L H R V G S A L D S Y E T R L N Y  
WP\_102856965.1/1-423 I L I A I V T L A C A A V A G Y A F . L A T P Y Y K T T T Y L R P S D R S L D Q L N . . . . . E T G I Y . K L A P D E A L G R V A S L S Y D L R R E F  
WP\_095601146.1/1-435 L L I A A I T A S A L L A A S Y A F F I A T P E Y Q V S V L R P A A I K D L D A L N . . . . . G T E V Y . P L T P D E A L R V G T A L D S Y E T R L E F  
WP\_095601145.1/1-425 L L I A G V A L G V T L L A A Y A F . L A T P Y Y K V Q S V V R P V D Q G A L D A L N . . . . . G T E I Y . E L T P S D A L A R V A A A L S Y E N R L K Y  
WP\_102851015.1/1-435 L I V I G V T L I V T L I A A Y A F . L A T P Y Y E T K Y L R P V P H S L D Q L N . . . . . E T G I Y . K L T P E E A I N R V A S G L S Y D N R L E F  
WP\_095943962.1/1-360 W M V V G T A L C G L V A G V Y A F . L T T P Y E S R Y Y I F P P T V N D I A L N F G R A . E R S E L K . P F T V D Q Y K I F L R N L Q S E S O R R A F  
S N T 2 3 9 5 6 . 1 / 1 - 3 8 1 L L I F L V T V A V T A V A L A Y A L . L A K P V Y E A K I F L A A P A T S D I A D L N Y G R T . Q O T G L E . P F T S R K V F D I F V E L N G E T I L R R Q F  
S D S 5 8 1 1 3 . 1 / 1 - 3 4 5 W I V I S V T I F V T L I A L C Y A F . L A K P I Y E S K I Y V A P T Q S E I S N F N Y G R I . N E M G L S . A F S V G L V Y K I F L R N L Q S E S R L Q A F  
WP\_087092368.1/1-349 K L I V I C I A F V V V F F S V C Y A F . F K V P L Y E A K V Y V V P P T Q D I S N L N Y G R T . S E S E L P . Y F T V K E I Y S T F L F N L Q S E S V R R S F  
WP\_092197691.1/1-355 W V I I S V T A I A V L G M M Y A F . F S E R V Y E A R A Y V P P T Q S D I A D L N V G R T . K E F D L E . P Y T I E H Y R L F L R N L L S E S L R Q E F  
WP\_077747951.1/1-351 R I L I L I T V T C L L A A V I Y A Y . L A K P V Y E A R A F V P P K Q S I A D L N F G R D . K K S D M D . P F T V K E Y S V L R N L Q S E S L R K R E L  
WP\_008049008.1/1-353 I V I L C A A L L G T F V A A S Y A F . L A E P L Y E A K A F V I P P T Q N D I E N L N Y G R I . D Q S K L P . Q F T V K D Y V S V F L K N L Q S E S L R Q F  
WP\_079305324.1/1-357 L I I I G V A L V I T A G A A Y A F . V S K P V Y E A K S F I L P P T Q N G I A E L N Y G R G G K S S D L Y . P S I Q Y V Y D V F A R N L Q S E S L R Q T F  
WP\_057713773.1/1-356 W V V I S V I I L V T I A S A V Y A F . T A K P L Y E A R I Y V L P P T Q N D I A D F N Y G R T . L N S D L P . P F T V K D Y V D V F V R N L F S E S L R R S F  
WP\_007985394.1/1-344 W T I F A T S V V T L I A V A Y V F . L A R P V Y E A S A I T M P P T Y K D I A N L N Y G R G . S E T E L V . P I T V K D Y S I F L Q S L Q E T I R Q T F  
WP\_102700290.1/1-347 Y I I L A A T L A G A V A A S Y A F . V A T P I Y E A K A F V P P T Y K D I A N L N Y G R T . K D T E L A . P Y S V K D Y V D V F L R N L R A E T L R R D F  
WP\_095143914.1/1-353 W L V I L S I A V T T L V A A V Y A Y . T A K P V Y E A K I F L P P T A N D I A S I N Y G R T . Q D S D L E . P L K V K D Y V Q V F L R S L Q S E T L R Q D F  
WP\_015093986.1/1-360 F I I I A I T A V V T I L A A S F T F . F S K P I Y E A K V F I P P T Q N D I A N Y N Y G R T . L E N E L S . P Y T I K E Y V S V F T R N L M A E S L R R E F  
A V O 6 0 4 2 3 . 1 / 1 - 3 5 1 V W I L I F T L L S V L F A A F A F . L S R P E Y E A K G Y V V P P T Q K D I E D F N Y G R T . K G S E L A . P Y T I K D Y G V F I S Y F Q A E S L R Q D F  
WP\_102643277.1/1-351 W L V I A V T V V I T L M A G A F A Y . L S Q P V Y E A R A Y V L P P T Q N D I E D F N Y G R T . P E L G F A . P Y S V R D Y V A V F I R N L Q S E S L K N R F  
WP\_010224134.1/1-358 F L I L L V T L V F G L F G L G Y V F . I T K P V Y E A K V S I P P T Q S Q I A E L N Y G R T . S E S G L D . P Y S L K D Y V D V F L R N L Q A E L R R E F  
WP\_093460654.1/1-355 T L I I L I T L V I T V A V G A Y A F . L S K P V Y E A K L F L Q P P T Y N S I A D F N Y G R T . K E A E L D . P Y S V K D Y V D V F I R N L Q S E S L R R K F  
WP\_102684334.1/1-353 I L V V G V A L V I T L A S I G Y A F . F A S P L F E A K V Y V Q P P F A H D V A R L N Q G R G . G D S G L K . L I S P K D A Y A I F L D C L N S E F L R R K F  
WP\_060492586.1/1-347 V L I A G L T L A L L L A A L Y A F . T R Q P V Y Q A D L A I V A P S H N D I S L I N Y G R G . E A T G L A . V I T V K D V Y E L Y A R H L Y S E N A R R K V  
WP\_095155502.1/1-368 A V V F V I V F L A V A L S L F Y I V . V R V P V Y E A K A I V E A P A Q E N I S Q L N Y G R G . G E S G L P . L L T T G D V Y E I Y V H H L L S E S O R R K F  
WP\_088851820.1/1-352 V T I F L A T L A G G G L A A I Y A W . T V A P V Y E S K V I V Q P P V Q T D I A R L N Y G R G . N G S G L S . L F S V K D Y V G V Y V R N L Q S E S L R D F  
WP\_014592020.1/1-350 W L V L V T V A V V A V F A I Y A I . A V T P V Y Q A K L N V Q P P L D S I N Q L N Y G R S . D G K G L L V P I T A K F V N D V Y L R N L Q S N V L R Q M F  
WP\_060514541.1/1-353 L I L L S S I A L V T V A A F V Y V S . L K T P L Y E A K S F I L P P T K N D I A Q L N Y G R T . E A S G L E . I F T P K D V Y E I Y L R S L Q S E S L R Q F  
WP\_011532778.1/1-346 L L V V K V A S L V F A L G L V Y V F . Y V P S R Y E A K L F T I P P T Q N D I A Q L N Y G R G . G S A E L P . L I S V G D V Y S S Y V R N L N S E S M R M E F  
WP\_069942143.1/1-352 W V V A L T A V V T L I G V A Y A L . L A T P I Y E A K V F V Q P P S Q R D I A Q L N Y G R G . G D S G L P . I L S V K A Y V E S Y V R Y V Q S E A V R D F  
WP\_028698674.1/1-358 L W V A V I A P I V L V G L A Y A L . L A P R V Y Q A R L F V P P S R D E I A Q L N Y G R G . G D S G L S . T Y S V K D Y V D V Y V R E L N S E T V R S K F  
WP\_058541039.1/1-356 M L I M V T T A V I F L S A L A Y A L . L A R P A Y E A K V F V Q P P T Q N D I A H F N Y G R G . P D T G L D . T L T V K D I Y D V Y V K H L Q S E S L R R S F  
WP\_090225885.1/1-350 R W V A G P T L A A L A C A G L Y L L . L T A P V Y Q A R T T L L P P T P A S I A F Y N Q D N G . . R A G L P . V W D S D A Y V S A F Q K Y L Q S D S L R L S F  
O F Q 7 9 1 7 4 . 1 / 1 - 3 4 5 V L I L L T L L A L I G S F T Y A Y . L S K P V Y E Y R V A V V P P A L G S I E G F N V G R R . . E N G L D . A Y T V R S I Y A I F S R N L L S D E N K K E F  
WP\_070581731.1/1-344 W L I A S F F L L A T A L A V Y A F . Y S R P I Y E A R A S V L P P S L N E I S G F N L G R K . . E S D L G . V F S V K D I Y D V F I R N L M A E E T R Q N F  
O 1 3 W z 1 / 1 - 3 4 9 W L I A C I T I L T S L V G T Y A F . L S K P V Y E A R I A V L P P S W S I A G F N L G R A . . E N G L T . V F S V N D Y V D V F L R N L L A E E T R R N F  
O F Q 3 0 1 4 6 . 1 / 1 - 3 4 8 W I V I G T A V V T L L A V Y A V . L K E P V Y E S K I T L P P P L S A V A G F N I G R T . R S E G L A . P F T V S D Y R V F T R N L E A D E N R R A F  
WP\_090444700.1/1-394 W L I L L V T L V S V G A T S Y A L . L A K P V Y E S R V T V M P P S L S E I A D F N L G R N . G G T G L K . P F S V G E Y V A V F T R N L Q A E K N R R Q F  
WP\_096347522.1/1-371 Y L I A V I T V A V M L I A V G Y A F . L A T P V Y Q S T V S V I P P R A A D I A P V N L G R E . . R A E I D . E L D I K E A Y S I F T R N L N S Q T S R R W F  
WP\_083700870.1/1-372 L I V I A I T M L L G A A A Y A Y . L S P R F Y E T K A S V L P P R L S E I S A Y N L G R V . . E A G L E . E F K V D D Y V A V F T R N L T S Q A L R Q R F  
WP\_089358910.1/1-358 W L I I G C T V L I T A L A A Y A F . L S T P T Y Q A S A G V M P P R L S E I A G Y N L G R S . . E A R K L N . E F T V E D Y G V Y K R N L S G S L K R Q E

110 120 130 140 150 160 170  
WP\_103462906.1/1-459 FRSRPEIVEA.FRDGGQSFEEQAFQGFN NSTALSVVQADPKK.GNLLSDFIGLKMRYGKDINGAVLNDFVDYAVELEBRAQL  
WP\_104882382.1/1-434 FRTNPPELREA.FVTPGRSEEEQGFHEFNRSALRVIQPDSKK.ADLLTTFIFIGLDRYPKGIIDGHHVNLGLVQYAIQKRESV  
WP\_088514052.1/1-496 YKANPQLQEQ.FVGAYSAPTHAFERFN RDLMKVQTDVQK.SAAFATSVNMQMRYPQGISGPDALNGLIEYAIQKRESV  
KDN97867.1/1-468 FRANPELFA.FFRPDQTAEEQVFAEFNRSSLLKLVQDPDKK.ADLLSSFIGLQLRYPKGVKGEELNGLVQYAIENERKQI  
WP\_078479769.1/1-454 FRSNPDIOAA.FTRPGYTAEQVFAEFNRSSLLKLVQDPDKK.ADLLSAYIGFQMRYPKGVGRGHDLNGLVQYAIENERKQI  
WP\_088851822.1/1-452 YEQHQNFFESP.YKRAGLTDQVLRMNTTEMLKVVMPPVAER..DFGQGRLOITMTYPEGVNGVRMLNDYVAFVKGEEAV  
WP\_009407565.1/1-451 FRENQQLFAP.YIIPNQSIQQSFDAFNRSVIALDALDVGKDAADFARAVNLTDYDPKGVVDGAFILNKFVDYVIEARQHI  
WP\_010224133.1/1-445 FRANPELFA.FFRPDQTAEEQVFAEFNRSSLLKLVQDPDKK.ADLLSAYIGFQMRYPKGVGRGHDLNGLVQYAIENERKQI  
WP\_095155722.1/1-411 FRANEALFKP.YLRAGMSVEEQVFAEFNRSSLLKLVQDPDKK.ADLLSAYIGFQMRYPKGVGRGHDLNGLVQYAIENERKQI  
SEE98527.1/1-443 FRTHEQDLFKP.LERQGISLEEQVFAEFNRSSLLKLVQDPDKK.ADLLSAYIGFQMRYPKGVGRGHDLNGLVQYAIENERKQI  
WP\_088500293.1/1-447 FRSHQDLFKP.LEKEGMLTEEQVFAEFNRSSLLKLVQDPDKK.ADLLSAYIGFQMRYPKGVGRGHDLNGLVQYAIENERKQI  
WP\_105696847.1/1-435 FRANQNLFKN.FVQPGRSLEEQVFAEFNRSSLLKLVQDPDKK.ADLLSAYIGFQMRYPKGVGRGHDLNGLVQYAIENERKQI  
SEI23467.1/1-450 FRANPELFA.FFRPDQTAEEQVFAEFNRSSLLKLVQDPDKK.ADLLSAYIGFQMRYPKGVGRGHDLNGLVQYAIENERKQI  
WP\_083351555.1/1-458 FRANQALFEP.FVRPGQTLTEEQVFAEFNRSSLLKLVQDPDKK.ADLLSAYIGFQMRYPKGVGRGHDLNGLVQYAIENERKQI  
SDU95947.1/1-478 FKANQALFEP.FVQPGRSLEEQVFAEFNRSSLLKLVQDPDKK.ADLLSAYIGFQMRYPKGVGRGHDLNGLVQYAIENERKQI  
WP\_084378137.1/1-454 FRENKLFEE.FFRPGRTLEEQVFAEFNRSSLLKLVQDPDKK.ADLLSAYIGFQMRYPKGVGRGHDLNGLVQYAIENERKQI  
WP\_094988732.1/1-456 FRDNQELFRQ.FKRPGRTLEEQVFAEFNRSSLLKLVQDPDKK.ADLLSAYIGFQMRYPKGVGRGHDLNGLVQYAIENERKQI  
WP\_034582629.1/1-464 FRAHPELFA.FFRPDQTAEEQVFAEFNRSSLLKLVQDPDKK.ADLLSAYIGFQMRYPKGVGRGHDLNGLVQYAIENERKQI  
AHZ68776.1/1-435 FKTYPQYLLAP.LQAPGKSIQQVFAEFNRSSLLKLVQDPDKK.ADLLSAYIGFQMRYPKGVGRGHDLNGLVQYAIENERKQI  
WP\_083368292.1/1-426 FQANPELFA.FFRPDQTAEEQVFAEFNRSSLLKLVQDPDKK.ADLLSAYIGFQMRYPKGVGRGHDLNGLVQYAIENERKQI  
WP\_070747362.1/1-442 FETHPELFA.FFRPDQTAEEQVFAEFNRSSLLKLVQDPDKK.ADLLSAYIGFQMRYPKGVGRGHDLNGLVQYAIENERKQI  
O13Wzz2/1-442 FETHPELFA.FFRPDQTAEEQVFAEFNRSSLLKLVQDPDKK.ADLLSAYIGFQMRYPKGVGRGHDLNGLVQYAIENERKQI  
WP\_075933891.1/1-437 FANQPELFA.FFRPDQTAEEQVFAEFNRSSLLKLVQDPDKK.ADLLSAYIGFQMRYPKGVGRGHDLNGLVQYAIENERKQI  
WP\_090231723.1/1-427 FRKNQELFRQ.FKRPGRTLEEQVFAEFNRSSLLKLVQDPDKK.ADLLSAYIGFQMRYPKGVGRGHDLNGLVQYAIENERKQI  
WP\_058067976.1/1-443 ALANKAERLSP.FSDSDGSEEQVFAEFNRSSLLKLVQDPDKK.ADLLSAYIGFQMRYPKGVGRGHDLNGLVQYAIENERKQI  
WP\_087516191.1/1-448 FQKHPELFA.FFRPDQTAEEQVFAEFNRSSLLKLVQDPDKK.ADLLSAYIGFQMRYPKGVGRGHDLNGLVQYAIENERKQI  
WP\_007942594.1/1-445 FDKHQEQFSG.IDSG.DLTLQAFERFNSEAFKVLQPDPAK.QGNLAPFVGRIRLTYPRGVDGPEAVNGLVHAIINVRSQV  
WP\_003458269.1/1-427 FHENPELFA.FFRPDQTAEEQVFAEFNRSSLLKLVQDPDKK.ADLLSAYIGFQMRYPKGVGRGHDLNGLVQYAIENERKQI  
WP\_015478627.1/1-434 FRDNQELFAA.LRVGDKSLEEQVFAEFNRSSLLKLVQDPDKK.ADLLSAYIGFQMRYPKGVGRGHDLNGLVQYAIENERKQI  
WP\_074859164.1/1-427 FRDNQALFEP.LKKGDKSLEEQVFAEFNRSSLLKLVQDPDKK.ADLLSAYIGFQMRYPKGVGRGHDLNGLVQYAIENERKQI  
WP\_093477159.1/1-432 YRNNRELFPSE.LESESRLEEQVFAEFNRSSLLKLVQDPDKK.ADLLSAYIGFQMRYPKGVGRGHDLNGLVQYAIENERKQI  
WP\_095626167.1/1-430 FNRHQEQFNV.LLRNGRTPLEEQVFAEFNRSSLLKLVQDPDKK.ADLLSAYIGFQMRYPKGVGRGHDLNGLVQYAIENERKQI  
WP\_095626245.1/1-424 YRDNQELFVSS.LNKTGRSLEEQVFAEFNRSSLLKLVQDPDKK.ADLLSAYIGFQMRYPKGVGRGHDLNGLVQYAIENERKQI  
WP\_102856965.1/1-423 FRQHPDLFEP.LMRDGRPDQVFAEFNRSSLLKLVQDPDKK.ADLLSAYIGFQMRYPKGVGRGHDLNGLVQYAIENERKQI  
WP\_095601146.1/1-435 SRAHPELFA.LQTPLRSEEQVFAEFNRSSLLKLVQDPDKK.ADLLSAYIGFQMRYPKGVGRGHDLNGLVQYAIENERKQI  
WP\_095601145.1/1-425 FRENQALFAP.LAESGRSLEEQVFAEFNRSSLLKLVQDPDKK.ADLLSAYIGFQMRYPKGVGRGHDLNGLVQYAIENERKQI  
WP\_102851015.1/1-435 FLNHQELFQV.IPQRGDSPLEEQVFAEFNRSSLLKLVQDPDKK.ADLLSAYIGFQMRYPKGVGRGHDLNGLVQYAIENERKQI  
WP\_095943962.1/1-360 FESTYLPAAEGGDATS.VSSGSLYAEFNSK.SMTVEPVGKEEDG...RWSVSLRHSNPEERSVAWLTSYVAVGESTARELI  
SNT23956.1/1-381 FKEFYMPSSVAG.Q.GAQQALYAAVNG.SFVYVQLA.GEPP...RAYVAFRGRDPAVSRWATAYVEKAGAAKAEV  
SDS58113.1/1-345 FNEVYLPGLDGERE.RSEEQVFAEFNRSSLLKLVQDPDKK.ADLLSAYIGFQMRYPKGVGRGHDLNGLVQYAIENERKQI  
WP\_087092368.1/1-349 FNDIYLPSLDATTRK.RSESALYSEFTK.RLVVSSPG.KDLAE...RYQVVMQGDSPAKSAELLDKFIIRAGEAAKREL  
WP\_092197691.1/1-355 FESTYLPAAEGGDATS.VSSGSLYAEFNSK.SMTVEPVGKEEDG...RWSVSLRHSNPEERSVAWLTSYVAVGESTARELI  
WP\_077747951.1/1-351 FLSMLPTFTAEAEK.QSQQVLYAQFTS.KLITAPSS.KDLDPD...RYSVSEFQHSASQTAEWLLDIYKRAAGEAAKQEI  
WP\_008049008.1/1-353 FKNTYLAAGKGS.E.DPKGRLYEKLSK.NLVISMVG.KDALD...RYSVVLNNDEEMGAKWIEQLLARAQQALQOEI  
WP\_079305324.1/1-357 FNDIYLPSLDESQR.GALDRLYVRFSR.ELVTKGSPS.KTTPD...RFSVTVOGGDPEVRAETWVKAYKRASEAASELI  
WP\_057713773.1/1-356 FDEVYLPSLTENARK.GSRDRLYQNFSK.QLVSVGG.KEGPD...RYSVTVOGYNPESEAGEWVRTYQNAAGVAAKNEM  
WP\_007985394.1/1-344 IAENVMAPGSSKDEGE.ARSNLYSELSK.LLVVSVQTR.KDLPD...EYVVTIQSSNPDAQANWQAEYIHRAGKLAEQEI  
WP\_102700290.1/1-347 FKVYLPVLSLSEDRK.QSDVLYADFSQ.LRVVVSPLKEASD...RYLVVVQTSNPEQARNWAAEYIAKAGDLAKNEM  
WP\_095143914.1/1-353 FKSXYLPVLSLSDAHE.AEQDLSLYSSYLK.QLVVKLPT.KDAGD...RAYVVMENDSPDEALSLWAKAYVHDASVMAKAEI  
WP\_015093986.1/1-360 FNNVYLPVLSLSEGRS.GSQDLYYAEFSK.LLMVALVN.KESSD...RYVVMQNESAAKGVLELVGKYIERASELAKKEI  
AVO60423.1/1-351 FNNVYLPVLSLSEGRS.GAQDGLYAGFSK.RLSIALPS.KDFAD...RYSITVRSDSPAQSVVWVHQYVARASDLAKREL  
WP\_102643277.1/1-351 FNEVYLPVLSLSDARR.GSQDYLYRKFITA.ALTIAQPS.KDFSD...RFTVVALNNQPVQANWLNLYIDQASDAAKKEI  
WP\_010224134.1/1-358 FNTHYLPVLSLGAAD.ASKDKLYERFGK.TLRVVSAG.KAEPD...RYVFSFQAGSPEEAQQLWLEYTKAGINARDEV  
WP\_093460654.1/1-355 FDDVYLPVLSLPKDKQE.GSRDLLYAALLA.DLTA.PV.RGSSD...RYEISARTNDPSVAQWITTEYLKRAADDVKAEM  
WP\_102684334.1/1-353 FLEYYLPVLSLQGRS.SRELLLYARFNK.LLAVAE...SQAPE...RYSIAMROSTPVMAAEWLSRYMQMANEAAKAAI  
WP\_060492586.1/1-347 FEEIFFPSLSESKA.QPQNVLFTRFSR.LFVLSKGT.DDAAA...RYVVSVDSEFAAAVKLADALANTAEEMTKSEL  
WP\_095155502.1/1-368 FESVYLPVLSLSEVQRR.GAVDLYRGFAR.LLQVVLQS.KSPA...RYSVSVKLPDPEQALWVKQYIEMAEVAAKAEV  
WP\_088851820.1/1-352 FLKYLPVLSLSEDRRA.GSQDGLYRFLKE.AVTLKGDG.KEASG...RWTVVVRSDDARRSVEVAQAFVEMAAARTKLEV  
WP\_014592020.1/1-350 YKRNYLPVLSVENVGE.ESQAGLYAKFNS.QFLVGVHQ.SE.Q...YATVTLAEDPKQAADWAVRYAEMAGEQSKKEL  
WP\_060514541.1/1-353 FRTVYLPVLSPEAARQ.GSQDLYYRFGK.VLTVGVVQ.DSAGS...RILVRLASDDPEMSVKKVTRFSEMSADRAKKTL  
WP\_011532778.1/1-346 FNDVYLPVLSLAEKQKT.SLRSDLYRQFFA.ALSILQGG.KDQSD...RYLITASSSSPEEAAKWVKQYIEMAGDRAKREI  
WP\_069942143.1/1-352 YREVYLPVLSLPEADR.GAQDLYYRFSK.AVSIAPAAT.KDSPE...RFQIVASSTDPQQAADWIVAYVQLAGDRAKKEV  
WP\_028698674.1/1-358 YRTVYEPALTGNERV.GSRDLYYRFLS.KLTVQVTK.KDGNP...RYVIAASTEDNQAAQWVAAAYEMASELAKKEV  
WP\_058541039.1/1-356 FQATYLPVLSLQGRS.SRELLLYRFFNK.LLIVAVAA.KDTPD...RFAITANVYSPQQAQWVAAAYEMASELAKKEV  
WP\_090225885.1/1-350 FRETVPVLSLSEQR.RPEGALYRRAFDT.LLQVAVLAD.RLKPY...ILQVLDVLSQEQQAADWIVAYVQLAGDRAKKEV  
OFQ79174.1/1-345 FYKIYLPVLSLQGRS.SRELLLYRFFNK.LLIVAVAA.KDTPD...RFAITANVYSPQQAQWVAAAYEMASELAKKEV  
WP\_070581731.1/1-344 FKEKYLPTLGDGK.A.ESLDALYRNFND.ELQIKASM.DGSG...RYLISAVAHESDTAAYLVDSYIEMVAGISKNEM  
O13Wzz1/1-349 FREVYLPVLSLSEGRS.SKDRLYSNLSE.EMEIQRPS.KDERE...RYTVEFKHDTGAADWGRYIKLAEGSMKEM  
OFQ30146.1/1-348 FRLYLPVLSLSEDRK.GPQDGLYRFFNE.IFTIKVPD.KQQPG...YTLIIEKRNPEAAADWVQKYIQMVAKQSLDEM  
WP\_090444700.1/1-394 FREVYLPVLSLSEGRS.SKDRLYSNLSE.EMEIQRPS.KDERE...RYTVEFKHDTGAADWGRYIKLAEGSMKEM  
WP\_096347522.1/1-371 FEERYLPVLSLQGRS.SRELLLYRRAFDT.LLQVAVLAD.RLKPY...ILQVLDVLSQEQQAADWIVAYVQLAGDRAKKEV  
WP\_083700870.1/1-372 FDEVYLPVLSLQGRS.SRELLLYRRAFDT.LLQVAVLAD.RLKPY...ILQVLDVLSQEQQAADWIVAYVQLAGDRAKKEV  
WP\_089358910.1/1-358 FDEVYLPVLSLPAEDAG.AAKDKLWDRFNS.DFSVQAPDAKNNPD...YFVVKVEGIEQVEVVAEWANKYIKMAADKSEEGM



18Q 19Q 20Q 21Q 22Q 23Q 24Q 25Q  
WP\_103462906.1/1-459 SRD M Q I I L A N R L A E V D A K L N S A L T E Y R T G N E G R I A R L E E S D T I K R A Q L N D E L K A L R V Q L R L Q R Q A R L A E L D E A I S I A R S L  
WP\_104882382.1/1-434 A E D L N V I V N N R I K E I D D E L V S A R A E Y D I A K K S Q I A A L Q E D D E V K R G Q L N D E L R A L R V Q L K L R R A D R I A Q L D E A I A I A R S L  
WP\_088514052.1/1-496 S D D L K V I V S N R L A E V D A K L A A A R S N Y D A T K Q G R I A E L L E A D R L K R A Q L Q D E L K A L R S Q L K L L R E D R I A Q L N E A I T I A R S L  
K D N 9 7 8 6 7 . 1 / 1 - 4 6 8 A D D L K V I I G N R L A E V D A K L A A A R A A Y E S S K D S K I A V L L E G D N L K R A K L V D E L K A L R V Q L K I Q R D D R V A Q L D E A I S I A H S L  
WP\_078479769.1/1-454 S D D L K V I I G N R L K E V D A K L V A A A R A D Y D A T K E S N I A E L L E S D S L S R A L Q D E L K A L R V Q L K Q R R E D R I S V L D E A I N I A R S L  
WP\_088851822.1/1-452 R H D V E S T R R S R V E G L A S E I D S L Q M V Y E H E K S A Q I A K L R E Q N I L R R A V L Q D E L G A L R V E L K T Q R A N R L H E L E A I A V A R S L  
WP\_009407565.1/1-451 S A D V S A L I K N R L A E I Q G K I D V A R A N Y Q M D K E A K I A A L I E A D N V R R A R L Q D E L S A L R V Q L K L L R A D R I A V L N E A I S I A R S L  
WP\_010224133.1/1-445 K A D M T V I V N N R M A E L A A Q L S A A R V A Y S S G K E S L I A G L L E Q D G L K Q A Q L Q D E L K A L R Q Q L K L N R I A R M Q Q L A E A I G I A R S L  
WP\_095155722.1/1-411 Q A D F D V I I K N R L N E V A A Q I D A Q R A V Y D G D K K S Q I A R L L E Q H N L K R S L L E D E L N A L R Q Q L K V Q R S N R I S E L S E A I S I A R S L  
S E E 9 8 5 2 7 . 1 / 1 - 4 4 3 S A D L K V I I N N R L R E L E A K I N S A A R S Y R E A E T G E I A T L L E A D T R K K A E L E D E L Q A L R L E L K I E R D A R V A Q L D E A I S I A R S L  
WP\_088500293.1/1-447 S S D L K T I I N N R Q K E L R E K I S A A R L G Y Q S D K E A K I A T L E E D D E L K R A T L K D E L Q A L R L Q L K A M R E A R I D Q L D E A I S I A S T L  
WP\_105696847.1/1-435 A A D L K V I V A N R L L E I D G K Y Q A A K A S Y E V D K E A K I E S L K E A D E V S Q A K L K D E L V A L D S Q L K T L R A D R I S Q L S E A I V I A Q S L  
S E I 2 3 4 6 7 . 1 / 1 - 4 5 0 S A D L G V I V Q N R L N E L K E K I A A A R S Y E M D K E A K I A S L L E A D N L K R D Q L Q D E L K A L R L Q L K A E R N D R I T Q L T E A I D I A K S L  
WP\_083351555.1/1-458 S A D L D V I V N N R I N E L K G R F D S A R S N Y E V E K E A K I A S L R E N D A L K R A Q L Q D E L R A L R S Q L K A L R N D R I A Q L N E A I G I A K S L  
S D U 9 5 9 4 7 . 1 / 1 - 4 7 8 G A D L K V I V N N R L A E L K G K I D A E R S N Y E T D K E S I A T L L E S D K L K R A Q L E D E L K A L R L Q M K M E R S N R I A E L S E A I S I A K S M  
WP\_084378137.1/1-454 A N D M E V I V D N R L N E I N G K L D A A R A S Y E N S K E A K I A S L M E A D T V R R A Q L R D E L K A L R A Q L K T R R A N R V A Q L D E A I G I A R S L  
WP\_094988732.1/1-456 A A D L K V I V N N R L N E L K G K I D A A R S S Y E N D K A A R I A T L Q E A D N L K R A Q L Q D E L K A L R Q Q L K V A R S D R M A Q L D E A I G I A K T L  
WP\_010284332.1/1-464 N S D I S T V V N N R L K A L D L R L Q K S R L S Y E T L K D L Q I A S L L E A D S V K R A R L D E M R A R A E L K T R R A N R I A Q L D E A I T A R R L  
A H Z 6 8 7 7 6 . 1 / 1 - 4 3 5 E S N F K T L V S N R I E K I E K N L D S K K S A Y A A T T S S I A G L L E K D Q I K K Q V L Q D E L K A L R Q Q L Q T R R Q N R I K E L D E A I V I A K Q L  
WP\_083368292.1/1-426 E A D F N A V I K N R L A Q T E R K I S S Y R A S Y T T E K E S R I A T L L E A D D K L Q I A I L Q D E L K A L R Q Q L K T R R N D R I A Q L D E A I S I A K K L  
WP\_070747362.1/1-442 L D D L Q A R I D G R L Q F L E Q D I E G K R A S Y Q A T K E G K I A R L L E A D S I R R A G L E D E L K A L R G R L K M V R D S R I Q Q L N E A I Q I A T R L  
O 1 3 W z 2 2 / 1 - 4 4 2 L D D L Q A R I D G R L Q F L E Q D I E G K R A S Y Q A T K E G K I A R L L E A D S I R R A G L E D E L K A L R G R L K M V R D S R I Q Q L N E A I Q I A T R L  
WP\_075933891.1/1-437 A E D V E V I I R N R L A K L E Q R M A S E A A Y Q A N K E A K I A S L E A N A L K R A Q L Q D E L N S R A R A E L K T R R A N R I A Q L D E A I T A K S L  
WP\_090231723.1/1-427 A Q D V E V I V Q N R L T K L E Q T M A E R S S Y Q A S K E A R I A A L T E A D D L K R A K L N D E L K A L R K Q L R T R R A N R I A Q L N E A I I A R S L  
WP\_058067976.1/1-443 E D D F N A V I K N R L A V L E R Q I S S Y R A S Y T T E K E S R I A T L L E A D S L K R A R L K D E L A L R Q M L L T R R N D R I A A L D E N I A I A K A L  
WP\_087516191.1/1-448 A A E V S T L V T N R L N K L Q S Q I A A A R I G Y E A D K O S K I A K L L E A D S V K R A N L M D E L A G L R Q Q L K L R R Q N R I M Q L T E A I M I A E Q L  
WP\_007942594.1/1-445 Q G D L N S V I D N S I D T L E R K M G V A R A S Y E A D K D S T I A K I S E N A D L K R A Q L Q D E L R A L R T E L L R D R R E S R I T Q L N E S M Q I A R L  
WP\_003458262.1/1-427 Q D D F D V F V N N R L T Q L Q S Q I A T E R A R S Y E A E K E I R I A E L T E A D S L K K S R L Q D E L R A L R Q Q L L Q V R R Q N R I A Q L N E A I Q I A E N L  
WP\_015478627.1/1-434 Q D D F N V L I K N R L T R V E R Q I A V Q R A A Y D T S K E A K I A A L L E A D S L R T I Q I T D E L K A L R Q Q L Q V R R Q N R I A Q L N E A I Q I A E R L  
WP\_074859164.1/1-427 A L D L E G V I K N R L N K I E R Q M A A R A S Y E A G K E A A I A K L S E D D K L Q I A I L Q D E L K A L R A E L R T H R Q N R I A Q L D E A I A I A K S L  
WP\_093477159.1/1-432 T A D H N A L V A S R I S E L D R K I N T A R A A Y E A E I E V R I A K L T E S D E L K R V Q L N D E L N A L R T Q L R Q R R E N R I A Q L E A I S I A S A L  
WP\_095626167.1/1-430 I A D L N V I I E N R L S V L D R K I I V A R A A Y E A E K S A R I A R L E E A D S L K R A E L H D E L L A L R Q E L R S K R D N R I E Q L D E A I Q I A K S L  
WP\_095626245.1/1-424 E T D I E V L I N N R L A T L E R R I N A A R A S Y E A E K E I R I A E L T E A D S L K R A Q L Q D E L R A L R E E L R Q R R A D R I A Q L D E A I T A S A L  
WP\_102856965.1/1-423 G R E V A H L A A N R L V G L E G Q I A A G R A A Y E S S K E S E I A A L L E K D A I K A A E L Q A E R D A L R I Q L T K R D N R I V Q L N E A I G I A E S L  
WP\_095601146.1/1-435 A A D L Q A V I K N R L D K L E R K I E A A R A S Y E T S K Q A K I A T L L E A D L K R A K L Q D E L R A L R Q L K T R R D R I A Q L N E A I R I A K S L  
WP\_095601145.1/1-425 A E D L K A L I A N R L A N L E Q K I E A A R A N Y N A S K E A Q I A T L L E E D A L Q R A K L Q D E L E A L R G E L K T R R E S R I S E L E A I R I A E S L  
WP\_102851015.1/1-435 A D D L E S L I G N R L A S L E M N M E A Q R A S Y N A S K E A K I A T L L E E S A L K R A Q L K D E L K A L R E L K T R R T N R I Q E L S E A I S I A E S L  
WP\_095943962.1/1-360 A Q N A K K E A V V A G R . . . . . S R V L E I D T L R E S S R K I R E D N I T K I R E A L F I A Q S S  
S N T 2 3 9 5 6 . 1 / 1 - 3 8 1 L H D A T R E A Q V R A N . . . . . A V L Q L E D N L R E S G Q Q R E D K I I R L Q E A L Q I A T A I  
S D S 5 8 1 1 3 . 1 / 1 - 3 4 5 I K N I T R E A E V R A R . . . . . D V R Q Q I S V L R E S S A E K K R E D S I A Q L R E A L I V A E K I  
WP\_087092368.1/1-349 I K N I T R E A E V R A M . . . . . N L A Q Q I A A V R E G G Q Q K R A D Y I V Q L K E A L Q V A S A I  
WP\_092197691.1/1-355 T K N V S Y E A K I R A Q . . . . . N M D W E I N A K R D A G E A V R E D T L V K L R A A L S I A E A T  
WP\_077747951.1/1-351 I Q N A Q R E A Q V R A G . . . . . D L E R Q I S I R R E K S L A I R E D W I V K L E A L V A E E I  
WP\_008049008.1/1-353 N K N I S S E Y D I E S Q . . . . . N L H Q E I V S L R E I G D K T R E D S L I K L R E A L V A Q A I  
WP\_079305324.1/1-357 I K N V T T E A S V K A R . . . . . N L E Q R I V S L R E T A K R R E D S I Q L R E A L K I A E A I  
WP\_057713773.1/1-356 I K N V V R E A Q V R A R . . . . . N L E Q Q I N G L R E S A R R E R E D K I K V L S E A L V I A R A V  
WP\_007985394.1/1-344 I K N V L Y E A D V K V R . . . . . S L D R Q I A D L R E N A Q K V R E D T I T K L R E A L R V A S A I  
WP\_102700290.1/1-347 I R N L S I E S E V R A R . . . . . N L E Q Q I S S A R D A S R A V K A E D S I A R L A E A L R I A E S I  
WP\_095143914.1/1-353 Y K D V S S E S A V H A R . . . . . N L S Q Q I D S L R E R S L K L R Q D S M T R L R E A L R V A E A I  
WP\_015093986.1/1-360 K K D M G S E A D V L A R . . . . . I R Q Q I A S L R D V G L K D R E D S I T K L R E A L V A E A I  
A V O 6 0 4 2 3 . 1 / 1 - 3 5 1 L A N V R R E A E V G A R . . . . . N V E Q Q I A A L R H V S Q K E R E D S V V R L R E A L Q V A E A L  
WP\_102643277.1/1-351 I K N F S K E I K I R I R . . . . . N N E T Q I S M M R E N A A N V R Q D T I R Q L L E A K V A G S I  
WP\_010224134.1/1-358 I E D A A R E A Q V R A R . . . . . N I S Q Q I S T L R E S G L K M R E D L I V R L R E A L R I A R A I  
WP\_093460654.1/1-355 I R N V T R E A E V R A R . . . . . N I E Q Q I E T L R I S G K E A Q E D S I V Q L K E A L R I A E S I  
WP\_102684334.1/1-353 I R G A Q V E V A L K V D . . . . . S L I K K I E V A R A N A L G E R E D R M V Q L R E A L V I A E K I  
WP\_060492586.1/1-347 V K N A L S D A S M R A V . . . . . M L D K E I I S G K R E V A R K E R E D R L I K L K E A L S I A L S V  
WP\_095155502.1/1-368 L E N V R S D A S T R A E . . . . . N L R R E I T A E R T A K R K R E D R E A R L R E A L A V A R S I  
WP\_088851820.1/1-352 I E D A R S D A L V L A E . . . . . S L E Q Q V E M A R E S S A R Q R K D R I A Q L K E A L K V A R A V  
WP\_014592020.1/1-350 I E R A V S D F K V E A D . . . . . N L Q Q S I D S A R A K A R L E R D D R I A Q L T E A L K I S K S I  
WP\_060514541.1/1-353 V E D A D T E V K V L V K . . . . . N L E Q Q V R S A R D A A H R Q R E D S I V R L R E A L K V A R A V  
WP\_011532778.1/1-346 L K N I Y S D A L V K A D . . . . . N L E K Q I R R E Q S S A R R E R D D R I A R L T E A L V I A R S V  
WP\_069942143.1/1-352 I A D V R A D A L V K A E . . . . . N L K E R V R S A R E G A R K E R E D R I A R L S E A L I V A Q S I  
WP\_028698674.1/1-358 L T G H R S E L A V K A E . . . . . N L Q W E I D A A Q A S A R K L R E D Q L R E A L K V A K S I  
WP\_058541039.1/1-356 L K N I K S D A T V K A N . . . . . N L Q R Q I L T A Q E T S R K Q R E D D I V Q L K E A L L I A K S I  
WP\_090225885.1/1-350 R E T V E A S I H O R G A . . . . . Q L Q R Q I L L R E T A L K R R K R I A A L K E A L Q I A R S V  
O F Q 7 9 1 7 4 . 1 / 1 - 3 4 5 I D S A G R D F O V R N A . . . . . A M Q S R I T V L Q N M A K G R R D D R I A R L K E A L L I A E S L  
WP\_070581731.1/1-344 L K N I K R D L H V K S V . . . . . N L E Q Q I N I M R A M A K T R R E D T I L R L R E A L K I A E A L  
O 1 3 W z 1 / 1 - 3 4 9 Q D A V Q R E F E V K S R . . . . . N I Q Q Q I D I L R D A A K A R R E D I N R L K E A Y Q I A E S L  
O F Q 3 0 1 4 6 . 1 / 1 - 3 4 8 L Q N A R R E L D V K A Q . . . . . N M R Q Q V D I L K E S A K E R R A D R I T Q L K E A L A I A K A L  
WP\_090444700.1/1-394 L K N A Q R E L A V H A Q . . . . . N I E Q Q I D G R R E S A K A R R E D R I T Q L R E A L T V A E A I  
WP\_096347522.1/1-371 E L D T R A Q V A N K I R . . . . . A F E E H I H A L R M T A K A E R L D V A R L R E A L K V A E A I  
WP\_083700870.1/1-372 Q Q N V L S E I D T R V Q . . . . . A I Q K R I D V L R S G A R V Q R E D R V A R L K E A L I I A E A A  
WP\_089358910.1/1-358 Q T N Q L T E I G T K A Q . . . . . S L A R Q V D A L R L T A E K R R K D R I A R L Q E A L I V A D A V

|                       | 26Q | 27Q | 28Q              | 29Q                 | 30Q  | 31Q        | 32Q    | 33Q   |                         |
|-----------------------|-----|-----|------------------|---------------------|------|------------|--------|-------|-------------------------|
| WP_103462906.1/1-459  | GLK | KKP | STPSLMADEV...    | SGGGNIIRTEVNGRPVP   | LYFM | GTEVLEAE   | RATLRK | RSD   | DFVAPRIGEIRKELLLLSNRRS  |
| WP_104882382.1/1-434  | GLK | RRP | STPSSMAHSEA...   | EGGGSVIRTEINNQQVP   | MYFL | GTDALAEAE  | KQALRE | RRTD  | DFVEPRVAQIRKELMMLEQNRT  |
| WP_088514052.1/1-496  | GLK | RRP | STPSSMANS...     | DSSGTINRTEVNNQOIP   | LYFM | GVDALAEAE  | RQVMRR | RSSD  | DFSDPKVAEIRKQLLVLANNRE  |
| KDN97867.1/1-468      | GLK | KKP | SSPSSMANES...    | EASTGSVIRTEVNNQOFP  | LYFM | GADALAEAE  | RRVLR  | RRTSD | DFSDPRVAQIRKELLLLATNRE  |
| WP_078479769.1/1-454  | GLK | KKP | STPSSMANS...     | EASGNVIRTEVNNQOIP   | LYFM | GTDALAEAE  | RQVLRK | RRTSD | DFADPRIAQIRRELSLLSNRO   |
| WP_088851822.1/1-452  | GLK | RRP | TTASLLGEGSM...   | AAGVNVIRTEISSQKEP   | LYFL | GTDVLEAE   | QAVLRK | RSD   | DFTNRRVAEIQKELQMLSVDRQ  |
| WP_009407565.1/1-451  | GIR | KKP | ATQSSLAETM...    | NGSGSVIKTEVNSQQAP   | LYFM | GSDALAEAE  | LATLAR | RKSD  | DFVTARTSEIAKELQMLQVNRE  |
| WP_010224133.1/1-445  | GIR | RRP | TPPMSLGDAAAR...  | PANNVFRTEVNNQAVP    | LYFM | GVDALAEAE  | RAALAK | RAND  | DFDGRVAQIAKELQLLQHNRO   |
| WP_095155722.1/1-411  | GIR | RRP | TPPMSLGDSDAQ...  | SSSGSVRTEVSNQOIP    | LYFM | GSDALAEAE  | RAVLR  | RRTSD | DFSTNRVAEIQKELQLLQANRO  |
| SEE98527.1/1-443      | GYT | HP  | TPPMSIADSVQ...   | TRSSQMRTEVTSQTMP    | LYFM | GTDVLEAE   | RAALLK | RRTND | DFTDERIAKTTKKLKLLEVNRR  |
| WP_088500293.1/1-447  | GIR | RRP | TPPYAMGESA...    | GGGSRVIRTDITSQDTP   | LYFL | GTDQALQAE  | RAVLRK | RRTSD | DFTDKRVLEIDKKLKLLEVNRE  |
| WP_105696847.1/1-435  | GIR | IKP | STPSSMGEGKG...   | ANGGNVMRTEITNNQMP   | LYFM | GVEALAEAE  | RRVLR  | RRTD  | GFDTGRTAQIAKELQLLKRNR   |
| SEI23467.1/1-450      | GIR | QKP | TPPSALAESG...    | ASSNNIMRTEVNNQOIP   | LYFM | GVDALAEAE  | RKVLNR | RSSD  | DFTEKRIAEIQKELLLKTNRO   |
| WP_083351555.1/1-458  | GIR | QKP | TPPSSLGESRN...   | AGANSVMRTEVNNQOVP   | LF   | FMGVEALNAE | LVALK  | RKSD  | DFDTPRVAQIAKELQLLASNRE  |
| SDU95947.1/1-478      | GIT | HP  | TPPSSMADAGR...   | DSSSQVMRTEVNNQKIP   | LYFM | GTEALAEAE  | RIALQH | RRTSD | DFDTNSRIAEIQKELQMLQVNRE |
| WP_084378137.1/1-454  | GIR | KKP | ATPSSLGADR...    | GGSSVMRTEINNQQIP    | LYFM | GVDALAEAE  | RIALVR | RKSD  | DFTEARIAEIVKELQLLEVNRR  |
| WP_094988732.1/1-456  | GIR | QKP | TPPSALGDSVR...   | SGDTSVMRTEINNQQIP   | LYFM | GVEALAEAE  | RAALLQ | RRTD  | DFTEGRIAQIAKELQLLQSNRE  |
| WP_1023458332.1/1-464 | GIR | QKP | TPPSALADNPA...   | NNATSVV.VADGVSRRD   | LYFL | GSDALAEAE  | RAALLV | RRTSD | DFVDTRIPQIAKELQMLERNRE  |
| AHZ68776.1/1-435      | GIV | RRP | TPPSSLADVQ...    | AREGNMIRTEVNNQOIP   | LYFM | GQLALAEAE  | RSTLVS | RRTSD | DFTEPRIDEIQKELSLAVNRK   |
| WP_083368292.1/1-426  | GIV | SP  | TPPSSLADVQ...    | AREGNMIRTEVNNQOIP   | LYFM | GQALAEAE   | RSTLVS | RRTSD | DFTEPRIDEIQKELSLAVNRK   |
| WP_070747362.1/1-442  | GIV | VP  | TPPGALGEVQ...    | DGSRSVFRTEVNNQOIP   | LYFM | GVDALTAEAE | RDTLKR | RKGD  | DFTEPRVAKIQKELQLENNRE   |
| O13Wz22/1-442         | GIV | VP  | TPPGALGEVQ...    | DGSRSVFRTEVNNQOIP   | LYFM | GVDALTAEAE | RDTLKR | RKGD  | DFTEPRVAKIQKELQLENNRE   |
| WP_075933891.1/1-437  | GID | KKP | STPSTLADSAP...   | MAGSGNVIRTEVNNQOIP  | LYFM | GAEALAEAE  | RNAIQ  | RRTSD | DFTEPRIAEIQADLRLLQVNRE  |
| WP_090231723.1/1-427  | NIV | RRP | ATPSSLGNAGQPA... | AGSQQGNVIRTEVNNQOIP | LYFM | GTDALAEAE  | KAAQLK | RRTSD | DFTEPRVQIEKELQLLQSNRE   |
| WP_058067976.1/1-443  | NI  | HKP | THPTSLGDAER...   | VAQGSVIRTEVNTHTDP   | LYFM | GTEALAEAE  | RNTLSK | RRTSD | DFTEPRIAEIQKELRLLQSNRE  |
| WP_087516191.1/1-448  | NI  | HKP | ATPSSMRDLGE...   | QASNNLIRTEVNTHTDP   | LYFM | GTEALAEAE  | RNTLSK | RRTSD | DFTEPRIAEIQKELRLLQSNRE  |
| WP_007942594.1/1-445  | GIV | KKP | NTPTAMGGD...     | VGQGNVFRTEVNEQFP    | LHFM | GTEALAEAE  | RNAIQ  | RRTSD | DFTEPRIAEIQKELQLLQSNRE  |
| WP_003458269.1/1-427  | GIA | KKP | TPPSALGDSAR...   | EVQGSVIRTEVNNQOIP   | LYFM | GSETLAEAE  | RSALQ  | RRTSD | DFTEPRIAEIQKELQLLQSNRE  |
| WP_015478627.1/1-434  | HIS | KKP | TPPSALGDNRR...   | EIQGSVFRTEVNNQOIP   | LYFM | GVEALAEAE  | RSALQ  | RRTSD | DFSEPRVSEIQKQLALLSHNRE  |
| WP_074859164.1/1-427  | GIS | KKP | NTPTSLGDVDA...   | AAGQGNVFRTEVNSQOIP  | LHFM | GTEALAEAE  | RNIQLK | RRTSD | DFTEPKIATIQKQLQMLLQSNRE |
| WP_093477159.1/1-432  | GIR | KKP | TPPSGMSQEQ...    | STGNVVRTEVNTHTDP    | LYFM | GTDALAEAE  | RKALQ  | RRTSD | DFTEPRIAEIQKELQLLQSNRE  |
| WP_095626167.1/1-430  | GIV | VP  | TPPSTLGNQTR...   | SASGNVIRTEVNNQOIP   | LYFM | GTEALDAEAE | RQALQ  | RRTSD | DFTEPRIAEIQKELQLLQSNRE  |
| WP_095626245.1/1-424  | NI  | RRP | TPPSALGQEV...    | TSGSVIRTEVNTHTDP    | LYFM | GTDALAEAE  | RKALQ  | RRTSD | DFTEPRIAEIQKELQLLQSNRE  |
| WP_102656965.1/1-423  | GIR | KKP | SPLALNTATI...    | DR.GTGQTPNTDGLTDP   | LYFL | GSEALAEAE  | REALQ  | RRTSD | DFTEPRIAEIQKELQLLQSNRE  |
| WP_095601146.1/1-435  | GIA | KKP | TPPSALGDEGR...   | SAQGNVIRTEVNNQOIP   | LYFM | GTEALAEAE  | RDALQ  | RRTSD | DFTEPRIAEIQKELQLLQSNRE  |
| WP_095601145.1/1-425  | GIA | KKP | TPPSAMSDAQ...    | SR.GQVVRTEVTSREIP   | LYFM | GTEALQAEAE | RKALQ  | RRTSD | DFTEPRIAEIQKELQLLQSNRE  |
| WP_102851015.1/1-435  | GIR | TP  | TPPSAMAEET...    | RGGAQVIRTEVNTHTDP   | LYFM | GTEALMAEAE | RDALQ  | RRTSD | DFTEPRIAEIQKELQLLQSNRE  |
| WP_095943962.1/1-360  | GL  | ENT | VVFAGR..GS...    | EKLGNMFDNT          | LYMR | GSKALAEAE  | LKNLE  | RSD   | DFTEPRIADIQSELAMLENNRE  |
| SNT23956.1/1-381      | GL  | QNP | PLISGE..VS...    | RALSGKMDGELT        | LYMR | GSKALAEAE  | IASLQ  | RRTSD | DFTEPRIADIQSELAMLENNRE  |
| SDS58113.1/1-345      | GL  | EVS | PAMTGG..IL...    | LEMQKEGVQEQ         | LYMR | GAKALAEAE  | IGNLE  | RASQ  | DFTEPRIADIQSELAMLENNRE  |
| WP_087092368.1/1-349  | GL  | LDS | PSVSGK..LF...    | VEVSN.SRETP         | LYMR | GAKALAEAE  | IQALE  | RRTSD | DFTEPRIADIQSELAMLENNRE  |
| WP_092197691.1/1-355  | GV  | RRP | VMIFDG..SP...    | NAAATNMTGEMS        | FLRG | VEALAEAE   | IKNLE  | RRTSD | DFTEPRIADIQSELAMLENNRE  |
| WP_077747951.1/1-351  | NI  | RRP | LIISGN..LS...    | AEMSGSMGQQL         | IYMR | GTKALAEAE  | IKNLE  | RRTSD | DFTEPRIADIQSELAMLENNRE  |
| WP_008049008.1/1-353  | GL  | RRP | PTVGSDDSKAS...   | IGIVGNMDDGLT        | LYMR | GTKALAEAE  | IKNLE  | RRTSD | DFTEPRIADIQSELAMLENNRE  |
| WP_079305324.1/1-357  | GL  | TRP | NTN.SS.GV...     | VDDITVEADNRMD       | YQ   | RGSKALAEAE | INALE  | RRTSD | DFTEPRIADIQSELAMLENNRE  |
| WP_057713773.1/1-356  | GL  | NKP | VIIISGR..TS...   | AELSLGVDSQA         | LYMR | GSDALQAEAE | IDGLR  | RRTSD | DFTEPRIADIQSELAMLENNRE  |
| WP_007985394.1/1-344  | GL  | KKP | PIITGN..PA...    | VQIAGSDVGDQL        | IYMR | GTKALAEAE  | IKNLE  | RRTSD | DFTEPRIADIQSELAMLENNRE  |
| WP_102700290.1/1-347  | GL  | KKP | PAITLS..QS...    | V.IAGGEGQLT         | LYMR | GIALKAEAE  | IKNLE  | RRTSD | DFTEPRIADIQSELAMLENNRE  |
| WP_095143914.1/1-353  | GL  | KKP | PIITGN..PA...    | VELAGSDGQV          | LYMR | GSKALAEAE  | IKNLE  | RRTSD | DFTEPRIADIQSELAMLENNRE  |
| WP_015093986.1/1-360  | GL  | RRP | PIISGN..SA...    | VEIAGNLGQV          | LYMR | GTKALAEAE  | IKNLE  | RRTSD | DFTEPRIADIQSELAMLENNRE  |
| AVO60423.1/1-351      | GL  | KKP | LIITGS..SA...    | IEVAGNIAGQP         | VYMR | GAKALAEAE  | IKNLE  | RRTSD | DFTEPRIADIQSELAMLENNRE  |
| WP_102643277.1/1-351  | GL  | KKH | QIIAGG..VA...    | GEMSGAGDSRL         | IYLR | GTKALAEAE  | VKTQ   | RRTSD | DFTEPRIADIQSELAMLENNRE  |
| WP_010224134.1/1-358  | GL  | KKP | PLIDGA..AS...    | AELAASVDGELT        | LYMR | GAKALAEAE  | IKNLE  | RRTSD | DFTEPRIADIQSELAMLENNRE  |
| WP_093460654.1/1-355  | GL  | ENP | PLISGN..LS...    | SEVSAMDGQV          | LYMR | GAKALAEAE  | IKNLE  | RRTSD | DFTEPRIADIQSELAMLENNRE  |
| WP_02684334.1/1-353   | GQE | KKP | VEVVDV..SV...    | AE..RGGARELV        | LYLR | GSKALAEAE  | IKNLE  | RRTSD | DFTEPRIADIQSELAMLENNRE  |
| WP_060492586.1/1-347  | GL  | RRP | PIITGS..A...     | SELSARMDGDL         | AYMR | GSEAIQAEAE | IKNLE  | RRTSD | DFTEPRIADIQSELAMLENNRE  |
| WP_095155502.1/1-368  | GL  | HRP | LALSGE..VA...    | AELSPGRVGVLS        | LYMR | GSDALGAEAE | IKNLE  | RRTSD | DFTEPRIADIQSELAMLENNRE  |
| WP_088851820.1/1-352  | NIE | SP  | PIVNS..LY...     | GGLSADEGGAR         | LYMR | GSRALAEAE  | IKNLE  | RRTSD | DFTEPRIADIQSELAMLENNRE  |
| WP_014592020.1/1-350  | GL  | KKP | PIIENN..LS...    | SEVSGMNGSL          | LYMR | GSKALAEAE  | IKNLE  | RRTSD | DFTEPRIADIQSELAMLENNRE  |
| WP_060514541.1/1-353  | SL  | KKP | PIIANG..LN...    | AEVSGMQGAL          | LYMR | GSGALAEAE  | IKNLE  | RRTSD | DFTEPRIADIQSELAMLENNRE  |
| WP_011532778.1/1-346  | GL  | VP  | PIIISA...        | ELTAQMNGLT          | LYMR | GSDALAEAE  | IKNLE  | RRTSD | DFTEPRIADIQSELAMLENNRE  |
| WP_069942143.1/1-352  | GL  | KKP | PIISGN..GN...    | SELSADMEGSL         | VYMR | GSRALAEAE  | IKNLE  | RRTSD | DFTEPRIADIQSELAMLENNRE  |
| WP_028698674.1/1-358  | GL  | KKP | PIISGS..LS...    | SEVSAMSGAL          | LYMR | GSAIEAEAE  | IKNLE  | RRTSD | DFTEPRIADIQSELAMLENNRE  |
| WP_058541039.1/1-356  | GL  | KKP | PIIFGN..LS...    | TEVSGMEGSL          | LYMR | GSKALAEAE  | IKNLE  | RRTSD | DFTEPRIADIQSELAMLENNRE  |
| WP_090225885.1/1-350  | GL  | ESP | QASSMRVAAQ...    | DNLASFIDGSL         | LYLR | GSAIEAEAE  | IKNLE  | RRTSD | DFTEPRIADIQSELAMLENNRE  |
| OFQ79174.1/1-345      | KID | GP  | PLIEGASE...      | QQLSSIMDGLT         | LYMR | GAKALAEAE  | IKNLE  | RRTSD | DFTEPRIADIQSELAMLENNRE  |
| WP_070581731.1/1-344  | KI  | ENP | PSFEGQTE...      | QQLSSIMIGEL         | LYMR | GAKALAEAE  | IKNLE  | RRTSD | DFTEPRIADIQSELAMLENNRE  |
| O13Wz1/1-349          | KL  | ENP | PLIGGQMD...      | QQLSSIMEGAL         | LYMR | GTKALAEAE  | IKNLE  | RRTSD | DFTEPRIADIQSELAMLENNRE  |
| OFQ30146.1/1-348      | NLV | KP  | PLVEGQSV...      | QQLSSIMDGLT         | LYMR | GTEAISAEAE | IKNLE  | RRTSD | DFTEPRIADIQSELAMLENNRE  |
| WP_090444700.1/1-394  | GL  | DDP | PVITGRSENN...    | RELSAFMDGNL         | LYMR | GSKALAEAE  | IKNLE  | RRTSD | DFTEPRIADIQSELAMLENNRE  |
| WP_096347522.1/1-371  | GL  | QSP | EVTGGRTOIS...    | VGSSGSAQVSDGSM      | FL   | LNKAIKAEAE | IKNLE  | RRTSD | DFTEPRIADIQSELAMLENNRE  |
| WP_083700870.1/1-372  | GIA | QAP | LVPSPSTVTS...    | LLKEETIISDQNL       | LYLR | GAKALAEAE  | IKNLE  | RRTSD | DFTEPRIADIQSELAMLENNRE  |
| WP_089358910.1/1-358  | GY  | DSP | QVTPGKTSV...     | GDFAEFMDGNL         | LYMR | GAKALAEAE  | IKNLE  | RRTSD | DFTEPRIADIQSELAMLENNRE  |



340 350 360 370 380 390 400 410  
WP\_103462906.1/1-459 VEAIKARVNDQDFLEGV EALRAERVRLQA I. NTELQGLQVLSIDQR AVAAAK PLKPRKALIVMFAFVC GLLGLV I IALVR  
WP\_104882382.1/1-434 MQSLEQRKND EFLFKGVEV LRAERSRLNA V. NTDLSGLRLVSV DQQATEP LS PVFPRKSVFISLGVIF GGVIGM V VYLLR  
WP\_088514052.1/1-496 VEVLKRRDND EFLFKGVEV LRAERVRLKES V. GADASSMR LVSIDQP AMAPVA PVQPKKLLVLAGLVV GVCVGI F LAIMR  
KDN97867.1/1-468 VEVLKQRENE DFLFKGVEV LRAERVRLTNI I. GTDMQHL SLVNIDQR AIEPTS TRPKNKALLIALGLFI GLLGMV M VAIFR  
WP\_078479769.1/1-454 VEVLKRENE EFLFKGVEV LRAERIRLENI I. STDSQLRLVSI DRFAVE PVN VAPQKLLWIALGLIL GAGIGL F LAILR  
WP\_088851822.1/1-452 IEVLQRRKEDAL FVAGTSAK RTEQALLEAQ. DSTLAGLRLVEV EQP ALA SE PIKPMRLILISFGALL GVI VGI MAVLR  
WP\_009407565.1/1-451 VEGLKARLNE DFLFDNV QP LRAEAARLQS L. STDFSHVQLVSI DQR ALP SES PVKPRRALIVLAGLIS GLGLGL L VAFAR  
WP\_010224133.1/1-445 VQLLQNRQND EFLQNVDD VRKEMDRLLKN L. GIDFDNI KMVQIDRR AIESLO PVRPRAIILVAVLV GLLVGV V VAILR  
WP\_095155722.1/1-411 VEILKRRQND EFLFLGIEP MEKEMVRLKGL. NTDMQEL KMVLDVRS ALQSPA PIKPMKSLVVLGALL GALLGA V FVLLA  
SEE98527.1/1-443 VEMLVNRTNE DFLFKYIEP LRAEAARLGS L. NTDMSRLGLVSI DRMAQTP TD PIKPKKALIVLGLVLF GLLVGL C IATAR  
WP\_088500293.1/1-447 VEQLGKRANE DFLVKNIEP LRAEIVRLGN L. NTDMSALGLVSI DRK AQT PVS ALKPKKALTIVLGLFL GLLGLG I ITTVR  
WP\_105696847.1/1-435 IEALNDRKKE DIFYAGVQP LRAEIVRLRS L. NVDLNMLKLVSLD QYALD PLA PVAPKKTIAVFGVLF GLMFGV V VYLLR  
SEI23467.1/1-450 VQILQRRNNE DFLIDVQQFRAEITRLRN L. NINMGKVKLVSI DRALALEP SA PIKPKKAMIVSLAFIF GLVFGV L LVVLR  
WP\_083351555.1/1-458 VEVLNARENE DFLAGVQP LRAEMARLSS L. NIDMAGLKLVTVD QALP LV AASP NRLLVVLGGLL GAVLAL C IALLR  
SDU95947.1/1-478 VEVLNKRNE DFLQDVQEP LRAEMARLGS L. NIDMSHLKLVTI DRRAQEP LS PVKPKKLVVVALSLVA GLVGLV L AAILR  
WP\_084378137.1/1-454 IEVLNAREKE DFLRDV EPLRAEEARLRN L. NLDISR IKLVTI DRV ALEP LE PVKPRKTLIVLGLVLL GFIVGL G GVVLR  
WP\_094988732.1/1-456 VEVLKQRQND EFLSGVEP LRAEVRLGN L. NLDFTNLKLVSI DRK ALEP MA PVKPKKSLIVVMGLLL GGMFGV F IALMR  
WP\_010224133.1/1-454 IEALQQRKLD DFLYQDIAS ITRAEVFELEQ. KLQASMLKLVSI DRQ AVSQA PASPNKLLVLAGLVA GLTLGF V VAILR  
AHZ68776.1/1-435 V GALMERNE DFLFDGIGD ITRGDLTRLKN L. NINFDQFELVHIDKALEP LS PVYPKTKVVGGLGILF GLALGV F VAILR  
WP\_083368292.1/1-426 VEILKRRNE DFLFKGLS IREELARLKN L. NIDFQFELVHIDKALEP LS PVYPKTKVVGGLGILF GLALGV F VAILR  
WP\_070747362.1/1-442 VQYLQARKGE ERFFENIDK LRGEQARLKT L. KASEPKIE LVRI DQKASTP LK PIKPRKALVVALGLL G LALGV L VALVR  
O13Wzz2/1-442 VQYLQARKGE ERFFENIDK LRGEQARLKT L. KASEPKIE LVRI DQKASTP LK PIKPRKALVVALGLL G LALGV L VALVR  
WP\_075933891.1/1-437 IE LLKQRAD E DFLYIENYAKWSQEAALKGL. NNLNSALQLVSI DRQ AVSQA PASPNKLLVLAGLVA GLTLGF V VAILR  
WP\_090231723.1/1-427 IEQLKQRDE DFLIGAYADWHKAAKLN L. NNLNLANLNVNI DQYAGAPYS PVKPRKALVVALGLL G LALGV L VALVR  
WP\_095626245.1/1-443 VEVLSSRKND EFLKRLARSREEQARLQA L. SVDFSNLKLVTI DRV ALEP LT PVGPRKLVVLAIGVLF GMLGMV F IALVR  
WP\_087516191.1/1-448 VEALRRHRGND DFLSKLAKWEEETS YLQEL. KPELLLLD LVDI DQPAVS PLS PIKPKKLLIVLGLVLF GMLGMV F IALVR  
WP\_007942594.1/1-445 IEQLKSRKND EFLFTTLV MRAEKSRL EHT. NRDLSELALVKVD QQA IKNK PIKPKKLLIVLGLVLF GMLGMV F IALVR  
WP\_003458426.1/1-427 IEILKQRND E DFLFKLVKLRGEQARLEN L. KVDFSRLKLVRI DQV ATAP QK PIKPRKALVVALGLL G LALGV L VALVR  
WP\_015478627.1/1-434 VEMLRGRAND EFLANLALTEQARLEHT. SVDFSQ LKLVLD QPAMTSG PVKPRKALVVALGLL G LALGV L VALVR  
WP\_074859164.1/1-427 IEMMQSRENE DFLAKLAKMREEAARLKS I. LNDLEQLKLVRI DQV A IKNK PIKPKKLLIVLGLVLF GMLGMV F IALVR  
WP\_093477159.1/1-432 IEMLQARENE DFLAE LAKLRSEARLKS I. ELDPQKLSLVRI DQV AVQ PVS AIKPKKPMIALGIVL GMLGM I IALMR  
WP\_095626167.1/1-430 VETLNSRENE DFLAE LAKLRSEARLKS I. SLEPEHLN LVRI DQV A IKNK PIKPKKALVVALGLVLF GLVGL IAVLVR  
WP\_095626245.1/1-424 IEVLSRENE DFLITELAE MRSERARLKS I. QNLNLEQLKLVRI DQV A IKNK PIKPKKALVVALGLVLF GLVGL IAVLVR  
WP\_102856965.1/1-423 VELMRQRD TD DFLADLANWRKEAHLKA L. DLDVEALKLVRLD QPAMTSG PVKPRKALVVALGLVLF GMLGM I FVALVR  
WP\_095601146.1/1-435 VEILKQRENE DFLSKLALWREEAARLRA L. NIDVSKLKVRI DQV AVEP SG PIKPKKLLIVLGLVLF GMLGM I FVALVR  
WP\_095601145.1/1-425 VELLKQRQDE DFLYKDLALWREEAARLKG I. KFDASGLQLVRI DQV ALEP LS RVKPKRALVVALGMV I GMLGL F VALLR  
O13Wzz1/1-349 VEILKERES E DFLYLTN LALWREEAARLKG I. KLDTERLKLVRLD QP ALQSTD PVKPKKAMIALGLVLF GMLGM I FVALVR  
WP\_095943962.1/1-360 . . . . . DFFTPGLRNL QKDVDFYK K L. ESEKFEI AAFRHDG VLDL PVS PVKPKKLVIVLGLVLF GMLGSS T ALLN  
SNT23956.1/1-381 . . . . . DAFIPELREV QTKQFYQMG L. VGAQRHV SVYQLDGT IEQPDV PIKPKKLLIVLGLVLF GMLGSS T ALLN  
SDZ58113.1/1-345 . . . . . DFFTDSLREHEARQYFYK L. MEFSPSRD SVYRMDG V IKNP AAR PIKPKKLLIVLGLVLF GMLGSS T ALLN  
WP\_087092368.1/1-349 . . . . . DFFITSLRQEAKYDLYRS L. MLFSPVGV SVYRMDG V IKNP AAR PIKPKKLLIVLGLVLF GMLGSS T ALLN  
WP\_092197691.1/1-355 . . . . . DAFITGLREL QAKKSFFEK L. AVTSPRI DMYRYMDG V IKNP AAR PIKPKKLLIVLGLVLF GMLGSS T ALLN  
WP\_077747951.1/1-351 . . . . . DFFIDGLREL QSRLEYFKG M. KVTPEIS SVYRMDG V IKNP AAR PIKPKKLLIVLGLVLF GMLGSS T ALLN  
WP\_008049008.1/1-353 . . . . . DFFISRLREIETKYNFYNO L. SKSYREAKAFRIDGLVEKSGS PVKPKKLLIVLGLVLF GMLGSS T ALLN  
WP\_079305324.1/1-357 . . . . . DAFISNLRQLMRYNFYRML. NLDIPERISVYRMDG V IKNP AAR PIKPKKLLIVLGLVLF GMLGSS T ALLN  
WP\_057713773.1/1-356 . . . . . DFFIQSLRVLQVKYLF LKN L. TIDSSV SVYRMDG V IKNP AAR PIKPKKLLIVLGLVLF GMLGSS T ALLN  
WP\_007985394.1/1-344 . . . . . DFFIGRLREL ESKRNFYK L. SSNLQDV SVYRMDG V IKNP AAR PIKPKKLLIVLGLVLF GMLGSS T ALLN  
WP\_102700290.1/1-347 . . . . . DFFTDRLREL QSKYNYFKG L. KTDAAA SVYRMDG V IKNP AAR PIKPKKLLIVLGLVLF GMLGSS T ALLN  
WP\_095143914.1/1-353 . . . . . DFFVTDLRLQLSKYDLYK L. EVNKPD SVYRMDG V IKNP AAR PIKPKKLLIVLGLVLF GMLGSS T ALLN  
WP\_015093986.1/1-360 . . . . . DFFIKKLRRLQAKYDFYK L. ESSILN SVYRMDG V IKNP AAR PIKPKKLLIVLGLVLF GMLGSS T ALLN  
AVO60423.1/1-351 . . . . . DFFIGRLREL QVKHDFYKGV. EVKAGD SVYRMDG V IKNP AAR PIKPKKLLIVLGLVLF GMLGSS T ALLN  
WP\_102643277.1/1-351 . . . . . DFFIANLRKLQGMNEFYK L. GVKAED SVYRMDG V IKNP AAR PIKPKKLLIVLGLVLF GMLGSS T ALLN  
WP\_010224134.1/1-358 . . . . . DFFINKLRDLQARYEFYAG L. EAEPGG SVYRMDG V IKNP AAR PIKPKKLLIVLGLVLF GMLGSS T ALLN  
WP\_093460654.1/1-355 . . . . . DFFIENLRDLQIKAGFYHG L. NVNPEV SVYRMDG V IKNP AAR PIKPKKLLIVLGLVLF GMLGSS T ALLN  
WP\_012684334.1/1-353 . . . . . DFFTPGLRVYQEELAFYQA L. KVGAEV SVYRMDG V IKNP AAR PIKPKKLLIVLGLVLF GMLGSS T ALLN  
WP\_060492586.1/1-347 . . . . . DFFIANLRQL EERMAFYRD L. KINEDAF SVYRMDG V IKNP AAR PIKPKKLLIVLGLVLF GMLGSS T ALLN  
WP\_095155502.1/1-368 . . . . . DFFIDGLRERQVELEFYSA L. KILPST IAVYRQDGA IGV DRS I LPSGVLVVVGSL GVVGV ASVLMW  
WP\_088851820.1/1-352 . . . . . DSFIDGLRKRREGQIHFLRK L. NVASENLQVFRQDGGV ELP DA PIKPKKLLIVLGLVLF GMLGSS T ALLN  
WP\_014592020.1/1-350 . . . . . DFFVNNLRREEQAAVYRS L. KVPSPDQ SVYRQDGV IEIET PIKPKKALVVALGMFA GLFLGI F IALVR  
WP\_060514541.1/1-353 . . . . . DFFVADLRREVQEKLDYFRN L. TLNAAE IVEVFRQDGA IEV DS VRLRKLIVMGGAFAG LVLGV L LASFT  
WP\_011532778.1/1-346 . . . . . DFFISNLRQREAEVSFYRS L. RIDPAL IVEVFRQDGD L IVP DR VSPKSLVLLIALCL GLAAGA C LALAR  
WP\_069942143.1/1-352 . . . . . DFFVDHLRRDQETIAFYET L. EIDPSV IVEVFRQDGGV L YADK PVKPKKSLIVLGLVLF GMLGSS T ALLN  
WP\_028698674.1/1-358 . . . . . DAFIDGLRRRQERLAFYRG L. KVDPQS VVFRQDGGV ELP DK PVKPRRALIVTAAVLV GLAVGV L VAIMR  
WP\_058541039.1/1-356 . . . . . DFFIQNLRDQQAALTYFRN L. SIDPAL VVFRQDGGV ELP DK PVKPKKLLIVLGLVLF GMLGSS T ALLN  
WP\_090225885.1/1-350 . . . . . DFFIESLRDLQEEKALFGLG L. RM. PDTMRTVQV DQV ALLP DA PVKPRALVLLVLAALLI GLIAGT L LASV L  
OFQ79174.1/1-345 . . . . . AFFIPELRLQEKLSWNS L. SVDSAV VVYKDEGLSFSNQ PIKPKKLLIVTIGTLAG L IIGI L LAVLA  
WP\_070581731.1/1-344 . . . . . DSFIDGLRALQERYALYTK L. SPDESQ SVYRMDG V IKNP AAR PIKPKKLLIVLGLVLF GMLGSS T ALLN  
O13Wzz1/1-349 . . . . . DFFIPALRLQEKQAMYST L. KLDVNK SVVFRQDGGV ELP DD PVRPCKKLLVLAGLV GVLWGM IAFIV  
OFQ30146.1/1-348 . . . . . DFFIPQLRGLLEERYKLYEN M. SLPVQR IAVFRQDGA VEI PDV PVKPKKVMIVLGLVLF GMLGSS T ALLN  
WP\_090444700.1/1-394 . . . . . DFFIPDLRNLLEEKYKLYAN V. KLDPERV VVFRQDGGV ELP DD PIKPKKLLIVLGLVLF GMLGSS T ALLN  
WP\_096347522.1/1-371 . . . . . DFFISELRDIQKQIAMNLV L. DPIPEFVQLFTLDSVAE VSEN PVKPKKANIVMIGITV GGLAGL V VALFR  
WP\_083700870.1/1-372 . . . . . DFFIPELRLRTQLAFLKS I. DVQPDNVAVFTLDRVAE P EL PANLRKSLIVIGLGA GVLGV F AGLVR  
WP\_089358910.1/1-358 . . . . . DFFIIVELRGENQMDFLQK I. DVNPDNVAVFTLDRVAE P EL TAPKLLVLAGLV GVLGGLV F IAFIR

|                      | 4 2 0       | 4 3 0     | 4 4 0       | 4 5 0                                       |                                  |                |       |    |       |       |       |       |       |       |       |       |        |        |        |        |    |       |   |   |   |   |       |   |   |   |       |
|----------------------|-------------|-----------|-------------|---------------------------------------------|----------------------------------|----------------|-------|----|-------|-------|-------|-------|-------|-------|-------|-------|--------|--------|--------|--------|----|-------|---|---|---|---|-------|---|---|---|-------|
| WP_103462906.1/1-459 | AAFKNNLRRMR | TA        | EVGGAVAVVLP | EDLSR.....QVNVLLPEAQIGAAKK...               |                                  |                |       |    |       |       |       |       |       |       |       |       |        |        |        |        |    |       |   |   |   |   |       |   |   |   |       |
| WP_104882382.1/1-434 | HALKSRRLDEL | LR        | ETILVKNVI   | .GSEVI.....APLPSTAQ.....                    |                                  |                |       |    |       |       |       |       |       |       |       |       |        |        |        |        |    |       |   |   |   |   |       |   |   |   |       |
| WP_088514052.1/1-496 | NLLVRRRLHLS | Q         | EVSMAPVVAKT | .QA.....PSLPESGR.....                       |                                  |                |       |    |       |       |       |       |       |       |       |       |        |        |        |        |    |       |   |   |   |   |       |   |   |   |       |
| KDN97867.1/1-468     | HFMVLRMRERS | SAPQALSQ  | VI          | NEPS.....QSIKGPSTSNVL.....                  |                                  |                |       |    |       |       |       |       |       |       |       |       |        |        |        |        |    |       |   |   |   |   |       |   |   |   |       |
| WP_078479769.1/1-454 | NAVHTRRRGS  | Q         | TQA         | AKPHSVA..ADAR.....SSLPAL.....               |                                  |                |       |    |       |       |       |       |       |       |       |       |        |        |        |        |    |       |   |   |   |   |       |   |   |   |       |
| WP_088851822.1/1-452 | RYIALRSV    | PFTSDR    | PKIVEASIQ   | ALK.....AVD.....                            |                                  |                |       |    |       |       |       |       |       |       |       |       |        |        |        |        |    |       |   |   |   |   |       |   |   |   |       |
| WP_009407565.1/1-451 | YQVQCMRTR   | SLRSALPRV | LEAQ        | .DPLL.....RPAETVRIE..                       |                                  |                |       |    |       |       |       |       |       |       |       |       |        |        |        |        |    |       |   |   |   |   |       |   |   |   |       |
| WP_010224133.1/1-445 | HYALQQASL   | AVGRQVEQ  | ...TE       | .RALERRTKGD.ALRETL.....                     |                                  |                |       |    |       |       |       |       |       |       |       |       |        |        |        |        |    |       |   |   |   |   |       |   |   |   |       |
| WP_095155722.1/1-411 | RYMTLRRS    | AMAIH     | .....       | .....                                       |                                  |                |       |    |       |       |       |       |       |       |       |       |        |        |        |        |    |       |   |   |   |   |       |   |   |   |       |
| SEE98527.1/1-443     | YLI         | NR        | RKQAL       | .....                                       |                                  |                |       |    |       |       |       |       |       |       |       |       |        |        |        |        |    |       |   |   |   |   |       |   |   |   |       |
| WP_088500293.1/1-447 | YFN         | VRRRDEL   | KQSS        | .....                                       |                                  |                |       |    |       |       |       |       |       |       |       |       |        |        |        |        |    |       |   |   |   |   |       |   |   |   |       |
| WP_105696847.1/1-435 | HLM         | LSRLP     | STTGLTQ     | VAVDS...LS.....VASEINRSPNSCRTEPS            |                                  |                |       |    |       |       |       |       |       |       |       |       |        |        |        |        |    |       |   |   |   |   |       |   |   |   |       |
| SEI23467.1/1-450     | QLI         | FLKHRSHV  | AEIAPV      | SVL.....PEESDSLMLR.....                     |                                  |                |       |    |       |       |       |       |       |       |       |       |        |        |        |        |    |       |   |   |   |   |       |   |   |   |       |
| WP_083351555.1/1-458 | SAI         | IVASRD    | ..I         | IKERSPGSQVS.RLNARGHIGE.LPDQQHSIQ..PIQK..... |                                  |                |       |    |       |       |       |       |       |       |       |       |        |        |        |        |    |       |   |   |   |   |       |   |   |   |       |
| SDU95947.1/1-478     | HFV         | LARHA     | ...TPPY     | SPLVDDR.FSRRERKDD.EPLV.....                 |                                  |                |       |    |       |       |       |       |       |       |       |       |        |        |        |        |    |       |   |   |   |   |       |   |   |   |       |
| WP_084378137.1/1-454 | QLF         | LLKKE     | ..G         | GENFSHSVAPA..MME...GD...VTNALPRSPSDRG.....  |                                  |                |       |    |       |       |       |       |       |       |       |       |        |        |        |        |    |       |   |   |   |   |       |   |   |   |       |
| WP_094988732.1/1-456 | YLV         | KSHRL     | ..Q         | QRLSPVLS.A.TLS...GA.QGVVSGNGKVLQSDRR.....   |                                  |                |       |    |       |       |       |       |       |       |       |       |        |        |        |        |    |       |   |   |   |   |       |   |   |   |       |
| WP_102684332.1/1-464 | HLF         | MSNASQ    | FKGTAFDR    | VESPGAVLRREDLSGG.RL.....R.....              |                                  |                |       |    |       |       |       |       |       |       |       |       |        |        |        |        |    |       |   |   |   |   |       |   |   |   |       |
| AHZ68776.1/1-435     | RLF         | QSFQATP   | H           | .....                                       |                                  |                |       |    |       |       |       |       |       |       |       |       |        |        |        |        |    |       |   |   |   |   |       |   |   |   |       |
| WP_083368292.1/1-426 | I           | V         | M           | FPKRRVQD.....                               |                                  |                |       |    |       |       |       |       |       |       |       |       |        |        |        |        |    |       |   |   |   |   |       |   |   |   |       |
| WP_070747362.1/1-442 | AM          | L         | R           | APRQVRQENSLPPG...VVSLDRSLSGT.....           |                                  |                |       |    |       |       |       |       |       |       |       |       |        |        |        |        |    |       |   |   |   |   |       |   |   |   |       |
| O13Wzz2/1-442        | AM          | L         | R           | TPRQVRQEDSLPPG...VVSLDRSLSGT.....           |                                  |                |       |    |       |       |       |       |       |       |       |       |        |        |        |        |    |       |   |   |   |   |       |   |   |   |       |
| WP_075933891.1/1-437 | FF          | L         | N           | ETGGRASLKYREG..I..EKAQL.....                |                                  |                |       |    |       |       |       |       |       |       |       |       |        |        |        |        |    |       |   |   |   |   |       |   |   |   |       |
| WP_090231723.1/1-427 | I           | L         | V           | SSSRKN.....                                 |                                  |                |       |    |       |       |       |       |       |       |       |       |        |        |        |        |    |       |   |   |   |   |       |   |   |   |       |
| WP_058067976.1/1-443 | A           | F         | L           | RQTPQAKVLISFEPKP..ELVDLPRAVVG.....          |                                  |                |       |    |       |       |       |       |       |       |       |       |        |        |        |        |    |       |   |   |   |   |       |   |   |   |       |
| WP_087516191.1/1-448 | S           | M         | M           | TRLKPI                                      | SLTMLNPLPV..EHAGH..KLVQQ.....    |                |       |    |       |       |       |       |       |       |       |       |        |        |        |        |    |       |   |   |   |   |       |   |   |   |       |
| WP_007942594.1/1-445 | G           | M         | V           | L                                           | SRSASPYEVSTEKV...FIGQ..STLQ..... |                |       |    |       |       |       |       |       |       |       |       |        |        |        |        |    |       |   |   |   |   |       |   |   |   |       |
| WP_003458269.1/1-427 | V           | M         | V           | L                                           | RQVRVGTAV.....                   |                |       |    |       |       |       |       |       |       |       |       |        |        |        |        |    |       |   |   |   |   |       |   |   |   |       |
| WP_015478627.1/1-434 | V           | V         | R           | G                                           | QPIVREERALVLN...YSS.....         |                |       |    |       |       |       |       |       |       |       |       |        |        |        |        |    |       |   |   |   |   |       |   |   |   |       |
| WP_074859164.1/1-427 | I           | V         | F           | T                                           | GNRTRSA.....                     |                |       |    |       |       |       |       |       |       |       |       |        |        |        |        |    |       |   |   |   |   |       |   |   |   |       |
| WP_093477159.1/1-432 | I           | V         | I           | R                                           | KRQAEKPA.....                    |                |       |    |       |       |       |       |       |       |       |       |        |        |        |        |    |       |   |   |   |   |       |   |   |   |       |
| WP_095626167.1/1-430 | I           | A         | L           | S                                           | SRRARAGTAVSL.....                |                |       |    |       |       |       |       |       |       |       |       |        |        |        |        |    |       |   |   |   |   |       |   |   |   |       |
| WP_095626245.1/1-424 | I           | A         | M           | R                                           | SRKSI                            | AKPTSEA.....   |       |    |       |       |       |       |       |       |       |       |        |        |        |        |    |       |   |   |   |   |       |   |   |   |       |
| WP_102856965.1/1-423 | A           | L         | L           | M                                           | SNSRVQPI.....                    |                |       |    |       |       |       |       |       |       |       |       |        |        |        |        |    |       |   |   |   |   |       |   |   |   |       |
| WP_095601146.1/1-435 | N           | I         | V           | R                                           | RKPD                             | TFAILR.....    |       |    |       |       |       |       |       |       |       |       |        |        |        |        |    |       |   |   |   |   |       |   |   |   |       |
| WP_095601145.1/1-425 | N           | L         | L           | R                                           | R                                | GEPGVAVPA..... |       |    |       |       |       |       |       |       |       |       |        |        |        |        |    |       |   |   |   |   |       |   |   |   |       |
| WP_102851015.1/1-435 | S           | L         | V           | N                                           | R                                | S              | D     | T  | H     | P     | V     | Y     | K     | ..... |       |       |        |        |        |        |    |       |   |   |   |   |       |   |   |   |       |
| WP_095943962.1/1-360 | H           | F         | I           | T                                           | K                                | R              | R     | D  | A     | D     | E     | S     | T     | V     | Q     | V     | V      | N      | .H     | .....R | L  | ..... |   |   |   |   |       |   |   |   |       |
| SNT23956.1/1-381     | Y           | A         | M           | Q                                           | N                                | L              | Q     | R  | R     | R     | A     | C     | P     | K     | N     | E     | .....  |        |        |        |    |       |   |   |   |   |       |   |   |   |       |
| SDS58113.1/1-345     | A           | S         | L           | R                                           | I                                | L              | F     | R  | K     | V     | ..... |       |       |       |       |       |        |        |        |        |    |       |   |   |   |   |       |   |   |   |       |
| WP_087092368.1/1-349 | D           | F         | L           | R                                           | A                                | S              | ..... |    |       |       |       |       |       |       |       |       |        |        |        |        |    |       |   |   |   |   |       |   |   |   |       |
| WP_092197691.1/1-355 | H           | H         | L           | G                                           | G                                | K              | R     | A  | K     | K     | S     | R     | V     | H     | Q     | V     | .....  |        |        |        |    |       |   |   |   |   |       |   |   |   |       |
| WP_077747951.1/1-351 | V           | F         | I           | A                                           | K                                | G              | R     | A  | R     | A     | L     | S     | ..... |       |       |       |        |        |        |        |    |       |   |   |   |   |       |   |   |   |       |
| WP_008049008.1/1-353 | D           | F         | F           | M                                           | T                                | N              | K     | V  | G     | I     | Q     | K     | T     | L     | ..... |       |        |        |        |        |    |       |   |   |   |   |       |   |   |   |       |
| WP_079305324.1/1-357 | F           | V         | L           | S                                           | R                                | N              | Q     | G  | A     | W     | R     | G     | .G    | E     | V     | G     | R      | .G     | .....  |        |    |       |   |   |   |   |       |   |   |   |       |
| WP_057713773.1/1-356 | Y           | F         | K           | P                                           | L                                | L              | R     | A  | K     | I     | L     | V     | P     | S     | S     | H     | T      | .....  |        |        |    |       |   |   |   |   |       |   |   |   |       |
| WP_007985394.1/1-344 | Y           | F         | L           | S                                           | S                                | N              | S     | K  | R     | S     | V     | F     | S     | Q     | ..... |       |        |        |        |        |    |       |   |   |   |   |       |   |   |   |       |
| WP_102700290.1/1-347 | G           | F         | F           | A                                           | A                                | K              | S     | E  | D     | ..... |       |       |       |       |       |       |        |        |        |        |    |       |   |   |   |   |       |   |   |   |       |
| WP_095143914.1/1-353 | Y           | L         | L           | D                                           | K                                | K              | H     | S  | T     | P     | R     | P     | L     | A     | ..... |       |        |        |        |        |    |       |   |   |   |   |       |   |   |   |       |
| WP_015093986.1/1-360 | N           | Y         | L           | S                                           | S                                | D              | G     | V  | R     | L     | F     | E     | S     | R     | S     | V     | A      | K      | .N     | .....R | Q  | ..... |   |   |   |   |       |   |   |   |       |
| AVO60423.1/1-351     | V           | Y         | L           | M                                           | S                                | R              | G     | R  | S     | V     | A     | P     | S     | ..... |       |       |        |        |        |        |    |       |   |   |   |   |       |   |   |   |       |
| WP_102643277.1/1-351 | H           | F         | W           | T                                           | V                                | R              | K     | P  | E     | ..... |       |       |       |       |       |       |        |        |        |        |    |       |   |   |   |   |       |   |   |   |       |
| WP_010224134.1/1-358 | A           | L         | I           | K                                           | R                                | V              | D     | P  | R     | S     | P     | H     | A     | S     | G     | A     | L      | .....  |        |        |    |       |   |   |   |   |       |   |   |   |       |
| WP_093460654.1/1-355 | Y           | V         | V           | R                                           | R                                | F              | R     | T  | A     | K     | R     | I     | D     | P     | S     | Q     | L      | .....  |        |        |    |       |   |   |   |   |       |   |   |   |       |
| WP_102684334.1/1-353 | L           | V         | W           | R                                           | G                                | V              | .R    | R  | R     | G     | S     | S     | A     | A     | E     | .L    | S      | S      | .....S | .....  |    |       |   |   |   |   |       |   |   |   |       |
| WP_060492586.1/1-347 | F           | F         | V           | R                                           | G                                | K              | .K    | A  | R     | F     | A     | ..... |       |       |       |       |        |        |        |        |    |       |   |   |   |   |       |   |   |   |       |
| WP_095155502.1/1-368 | Y           | L         | I           | S                                           | V                                | A              | F     | L  | ...S  | P     | D     | N     | G     | N     | H     | G     | .....K | R      | R      | R      | H  | G     | G | G | D | S | G     | Q | V | L | ..... |
| WP_088851820.1/1-352 | Y           | L         | R           | G                                           | N                                | L              | H     | R  | F     | R     | C     | K     | S     | E     | ..... |       |        |        |        |        |    |       |   |   |   |   |       |   |   |   |       |
| WP_014592020.1/1-350 | E           | A         | W           | R                                           | F                                | R              | .Q    | A  | R     | L     | R     | T     | ..... |       |       |       |        |        |        |        |    |       |   |   |   |   |       |   |   |   |       |
| WP_060514541.1/1-353 | H           | L         | V           | S                                           | A                                | E              | .R    | M  | R     | R     | L     | K     | R     | A     | ..... |       |        |        |        |        |    |       |   |   |   |   |       |   |   |   |       |
| WP_011532778.1/1-346 | H           | G         | W           | V                                           | R                                | R              | .T    | V  | V     | S     | K     | ..... |       |       |       |       |        |        |        |        |    |       |   |   |   |   |       |   |   |   |       |
| WP_069942143.1/1-352 | A           | F         | F           | V                                           | V                                | R              | .R    | F  | A     | A     | G     | V     | R     | ..... |       |       |        |        |        |        |    |       |   |   |   |   |       |   |   |   |       |
| WP_028698674.1/1-358 | D           | L         | L           | Q                                           | R                                | R              | .R    | .K | P     | A     | A     | L     | S     | R     | V     | I     | G      | .....N | E      | .....  |    |       |   |   |   |   |       |   |   |   |       |
| WP_058541039.1/1-356 | H           | L         | F           | R                                           | Q                                | A              | .L    | R  | Q     | R     | P     | S     | S     | L     | A     | G     | T      | .....  |        |        |    |       |   |   |   |   |       |   |   |   |       |
| WP_090225885.1/1-350 | G           | A         | T           | M                                           | R                                | K              | G     | E  | A     | R     | ..... |       |       |       |       |       |        |        |        |        |    |       |   |   |   |   |       |   |   |   |       |
| OFQ79174.1/1-345     | G           | F         | I           | R                                           | K                                | L              | R     | S  | D     | G     | S     | L     | R     | ..... |       |       |        |        |        |        |    |       |   |   |   |   |       |   |   |   |       |
| WP_070581731.1/1-344 | I           | V         | Q           | F                                           | R                                | R              | ..... |    |       |       |       |       |       |       |       |       |        |        |        |        |    |       |   |   |   |   |       |   |   |   |       |
| O13Wzz1/1-349        | M           | A         | V           | R                                           | R                                | S              | R     | A  | K     | ..... |       |       |       |       |       |       |        |        |        |        |    |       |   |   |   |   |       |   |   |   |       |
| OFQ30146.1/1-348     | H           | V         | L           | R                                           | K                                | S              | R     | V  | S     | ..... |       |       |       |       |       |       |        |        |        |        |    |       |   |   |   |   |       |   |   |   |       |
| WP_090444700.1/1-394 | L           | M         | L           | K                                           | K                                | R              | L     | P  | H     | S     | ..... |       |       |       |       |       |        |        |        |        |    |       |   |   |   |   |       |   |   |   |       |
| WP_096347522.1/1-371 | A           | A         | I           | R                                           | R                                | R              | K     | H  | E     | V     | Q     | T     | G     | E     | R     | ..... |        |        |        |        |    |       |   |   |   |   |       |   |   |   |       |
| WP_083700870.1/1-372 | G           | L         | V           | R                                           | R                                | R              | L     | L  | A     | A     | Q     | A     | D     | S     | E     | M     | T      | A      | .H     | .....A | .A | S     | A | G | G | A | ..... |   |   |   |       |
| WP_089358910.1/1-358 | M           | F         | E           | I                                           | N                                | R              | T     | D  | ..... |       |       |       |       |       |       |       |        |        |        |        |    |       |   |   |   |   |       |   |   |   |       |

**Figure S3 Multiple sequence alignment of Wzz<sub>1</sub> and Wzz<sub>2</sub> homologs.** The alignment shows two clear protein groups. The group containing Wzz<sub>2</sub> (sequences coloured red) has several insertions and deletions compared to the group containing Wzz<sub>1</sub> (sequences

coloured blue). Figure is continued from previous six pages. Identical residues are coloured white with a red background and residues with a similarity score  $> 0.7$  are coloured red with a white background.

1            10            20            30            40            50            60  
 O13Wzz2 MPSSQLPGASPSEI **D**IVQLFQQ **L**WAS **K**WLI **I**ALIAALAT **A**AALAYALL **A**VPT **Y**QVDVL **L**RP

70            80            90            100            110            120  
 O13Wzz2 IQTKA **L**EAVN **V**KGLYAL **T**PRE **A**LD **R**VGNELAA **Y**SG **R**LE **V**FETHPEL **F**QQLNAEGL **S**PEQA

130            140            150            160            170            180  
 O13Wzz2 FWKF **N**QDA **F**S **M**QQADL **K**KDPQA **A**PF **F**RL **S**MQ **Y**PQ **G**MD **G**AA **I**NGM **L**AST **I**ENE **R**QR **I**LD **D**

Ins<sub>IL</sub>

190            200            210            220            230            240  
 O13Wzz2 LQAR **I**DG **R**I **Q**F **L**EQD **I**E **G**K **R**AS **Q**AT **K**EG **K** **I**AR **L**L **E**ADS **I**RRAG **E**DEL **K**AL **R**GR **I**K **M**V **R**

Ins<sub>α6</sub>

250            260            270            280            290            300  
 O13Wzz2 DS **R**I **Q**Q **L**N **E**AI **Q** **I**ATR **L**GI **V**K **T**TP **G**AL **G**EV **G**Q **D**GS **R** **S**V **F** **R**TE **V**NN **Q**Q **I** **P**LY **F** **M**C **V**D **S**T

Ins<sub>L4</sub>

310            320            330            340            350            360  
 O13Wzz2 **A**ER **D**T **L**L **K** **K**G **D**D **F**TE **P**RV **A**K **I**R **Q**E **F** **K**Q **L**EN **N**RE **V**Q **Y** **L**QA **R** **K**G **E**ER **F**FEN **I**DK **L**R **G**E **Q**AR

Ins<sub>α7</sub>

370            380            390            400            410            420  
 O13Wzz2 **L**KT **L**KASE **P**K **I**E **L**VR **I**D **Q**K **A**ST **P**L **K**P **I**K **P**R **K**AL **V**V **A**LC **L**L **G**L **V**FG **V**LV **A**L **V**R **A**ML **R**T **P**R

430            440  
 O13Wzz2 QRVQEDSLPPGVVSLDRSLSGT

**Figure S4 Conserved residues of Wzz<sub>2</sub> targeted for site directed mutagenesis.** The residues targeted are indicated by the black arrows. Residues are coloured as follows: red box with white text, completely conserved amongst the Wzz<sub>2</sub> group; blue box with red text, similarity score > 0.9 amongst the Wzz<sub>2</sub> group.

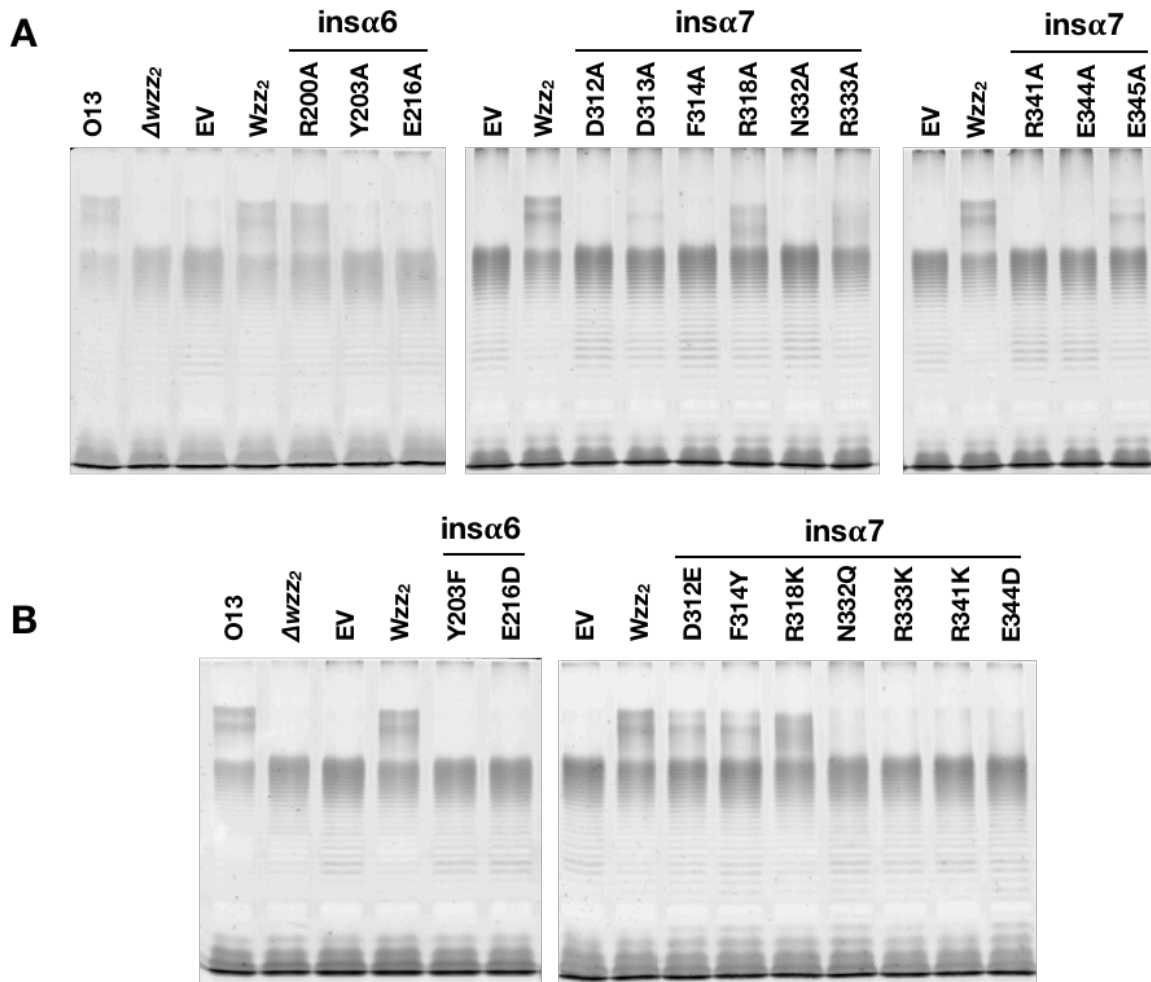

**Figure S5 Chain length phenotypes conferred by *Wzz<sub>2</sub>* variants when expressed at basal levels.** A) Alanine variants R318A and R333A alter the banding pattern while Y203A, E216A, D312A, F314A, R318A, N332A, R341A, and E344A abolishes chain length control. B) Like-amino acid switches D312E and F314Y are the only variants that restore very long OSA production to wildtype lengths. The R318K variant produces very long OSA that is shorter than the wildtype.

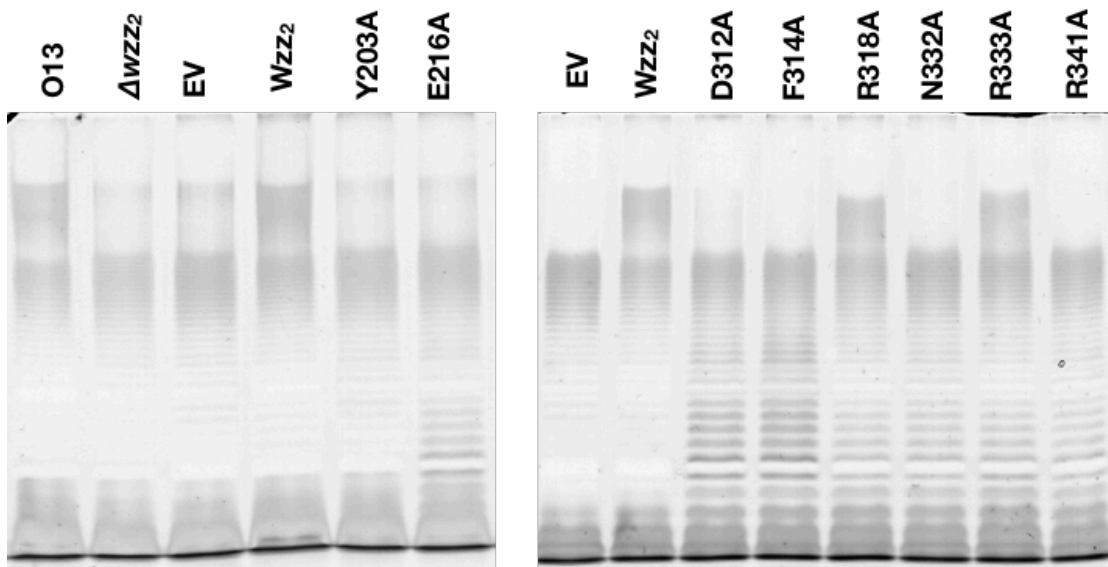

**Figure S6 Silver-stained SDS-PAGE gel of FLAG-tagged Wzz<sub>2</sub> single amino acid mutants.** Bacteria containing each plasmid were cultured in the presence of 0.1% L-arabinose. The LPS profiles are indistinguishable from the corresponding untagged mutant proteins (Fig. 5A).

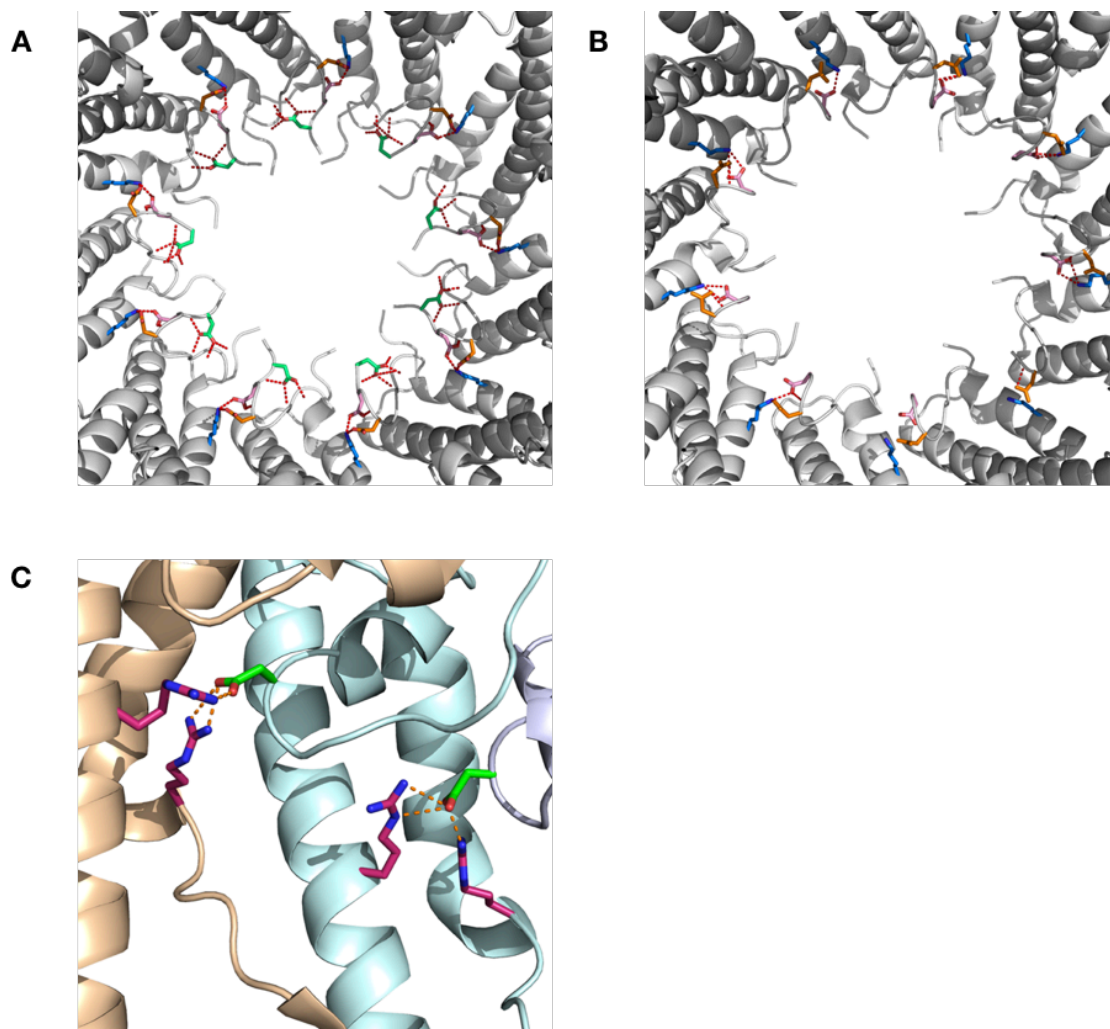

**Figure S7 Loop 4 interacts with residues of the  $\alpha$ -helical domain.** The loop regions of the experimentally determined structures of A) FepE (PDB ID: 3B8M) and B) FepE $\Delta$ 258:266::GSG (PDB ID: 4E2L) are viewed from within the cavity of Wzz and looking towards the top of the oligomer. Residues D265, D266, D268, and K281 are shown in green, pink, orange, and blue, respectively. For clarity, only the side chains of these residues are shown. In the wildtype FepE protein, these residues are predicted to engage in more polar contacts (red dashed lines) than the mutant. C) D226 of WzzB<sub>SF</sub> (PDB ID: 4ZM1) forms potential salt bridges with R196 and R246. Three separate

protomers are shown in beige, blue, and purple. D226 is shown in green and R196 and R246 is shown in red.



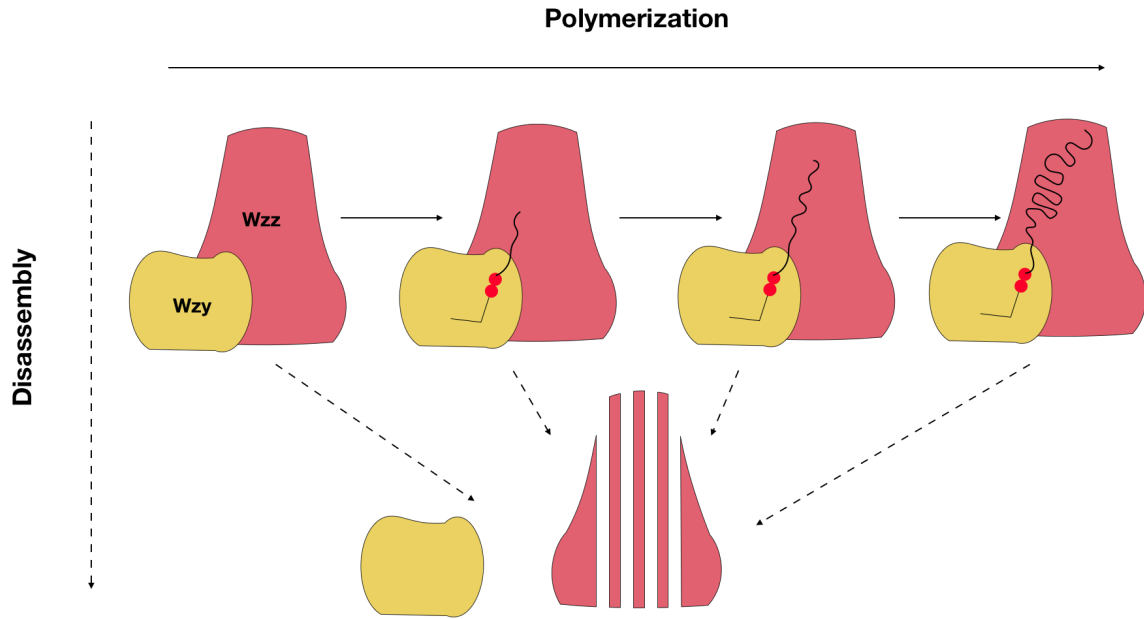

**Figure S8 Model of Wzz-mediated chain length regulation.** As the O antigen chain is polymerized by Wzy, the polysaccharide enters the cavity of Wzz, which exerts a force that promotes Wzz disassembly (dashed arrows). If the Wzz oligomer is stabilized by strong inter-/intra-protomer interactions, interactions with the polysaccharide, or interactions with Wzy, polymerization into the cavity proceeds for more rounds of polymerization (solid line). When the maximum internal capacity of Wzz has been filled, the complex disassembles.
